# Supplementary material for: Discovery and Synthesis of a Pyrimidine-Based Aurora Kinase Inhibitor to Reduce Levels of MYC Oncoproteins
Source: PubMed Central journal article supplement (PMC8279414; doi:10.1021/acs.jmedchem.0c01806), 2021-05-19

## Supporting Information (SI)

### Discovery and Synthesis of a Pyrimidine-Based Aurora Kinase Inhibitor to Reduce Levels of MYC Oncoproteins

Ya-Hui Chi,<sup>\*||</sup> Teng-Kuang Yeh,<sup>||</sup> Yi-Yu Ke, Wen-Hsing Lin, Chia-Hua Tsai, Wan-Ping Wang, Yen-Ting Chen, Yu-Chieh Su, Pei-Chen Wang, Yan-Fu Chen, Zhong-Wei Wu, Jen-Yu Yeh, Ming-Chun Hung, Mine-Hsine Wu, Jing-Ya Wang, Ching-Ping Chen, Jen-Shin Song, Chuan Shih, Chiung-Tong Chen, and Chun-Ping Chang<sup>\*</sup>

## Table of Contents

|                                                                                                                                                          |     |
|----------------------------------------------------------------------------------------------------------------------------------------------------------|-----|
| Figure S1. Western blot profile of cMYC and MYCN in cells treated with various Aurora kinase inhibitors.....                                             | S3  |
| Figure S2. Cell viability, cell cycle analysis and expression profile of the target proteins in cells treated with various Aurora kinase inhibitors..... | S4  |
| Figure S3. NMR and HPLC spectra of compound 1 .....                                                                                                      | S5  |
| Figure S4. NMR and HPLC spectra of compound 2 .....                                                                                                      | S7  |
| Figure S5. NMR and HPLC spectra of compound 3 .....                                                                                                      | S9  |
| Figure S6. NMR and HPLC spectra of compound 4 .....                                                                                                      | S11 |
| Figure S7. NMR and HPLC spectra of compound 5 .....                                                                                                      | S13 |
| Figure S8. NMR and HPLC spectra of compound 6 .....                                                                                                      | S15 |
| Figure S9. NMR and HPLC spectra of compound 7 .....                                                                                                      | S17 |
| Figure S10. NMR and HPLC spectra of compound 8 .....                                                                                                     | S19 |
| Figure S11. NMR and HPLC spectra of compound 9 .....                                                                                                     | S21 |
| Figure S12. NMR and HPLC spectra of compound 10 .....                                                                                                    | S23 |
| Figure S13. NMR and HPLC spectra of compound 11 .....                                                                                                    | S25 |
| Figure S14. NMR and HPLC spectra of compound 12 .....                                                                                                    | S27 |
| Figure S15. NMR and HPLC spectra of compound 13 .....                                                                                                    | S29 |
| Figure S16. NMR and HPLC spectra of compound 14 .....                                                                                                    | S31 |
| Figure S17. NMR and HPLC spectra of compound 15 .....                                                                                                    | S33 |
| Figure S18. NMR and HPLC spectra of compound 16 .....                                                                                                    | S35 |
| Figure S19. NMR and HPLC spectra of compound 17 .....                                                                                                    | S37 |
| Figure S20. NMR and HPLC spectra of compound 18 .....                                                                                                    | S39 |
| Figure S21. NMR and HPLC spectra of compound 19 .....                                                                                                    | S41 |
| Figure S22. NMR and HPLC spectra of compound 20 .....                                                                                                    | S43 |
| Figure S23. NMR and HPLC spectra of compound 21 .....                                                                                                    | S45 |
| Figure S24. NMR and HPLC spectra of compound 22 .....                                                                                                    | S47 |
| Figure S25. NMR and HPLC spectra of compound 23 .....                                                                                                    | S49 |
| Figure S26. NMR and HPLC spectra of compound 24 .....                                                                                                    | S51 |
| Figure S27. NMR and HPLC spectra of compound 25 .....                                                                                                    | S53 |
| Figure S28. NMR and HPLC spectra of compound 26 .....                                                                                                    | S55 |
| Figure S29. NMR and HPLC spectra of compound 27 .....                                                                                                    | S57 |
| Figure S30. <sup>1</sup> H NMR spectrum of compound 29 .....                                                                                             | S59 |
| Figure S31. <sup>1</sup> H NMR spectrum of compound 30 .....                                                                                             | S60 |
| Figure S32. <sup>1</sup> H NMR spectrum of compound 32 .....                                                                                             | S61 |
| Figure S33. <sup>1</sup> H NMR spectrum of compound 33 .....                                                                                             | S62 |
| Figure S34. <sup>1</sup> H NMR spectrum of compound 34 .....                                                                                             | S63 |

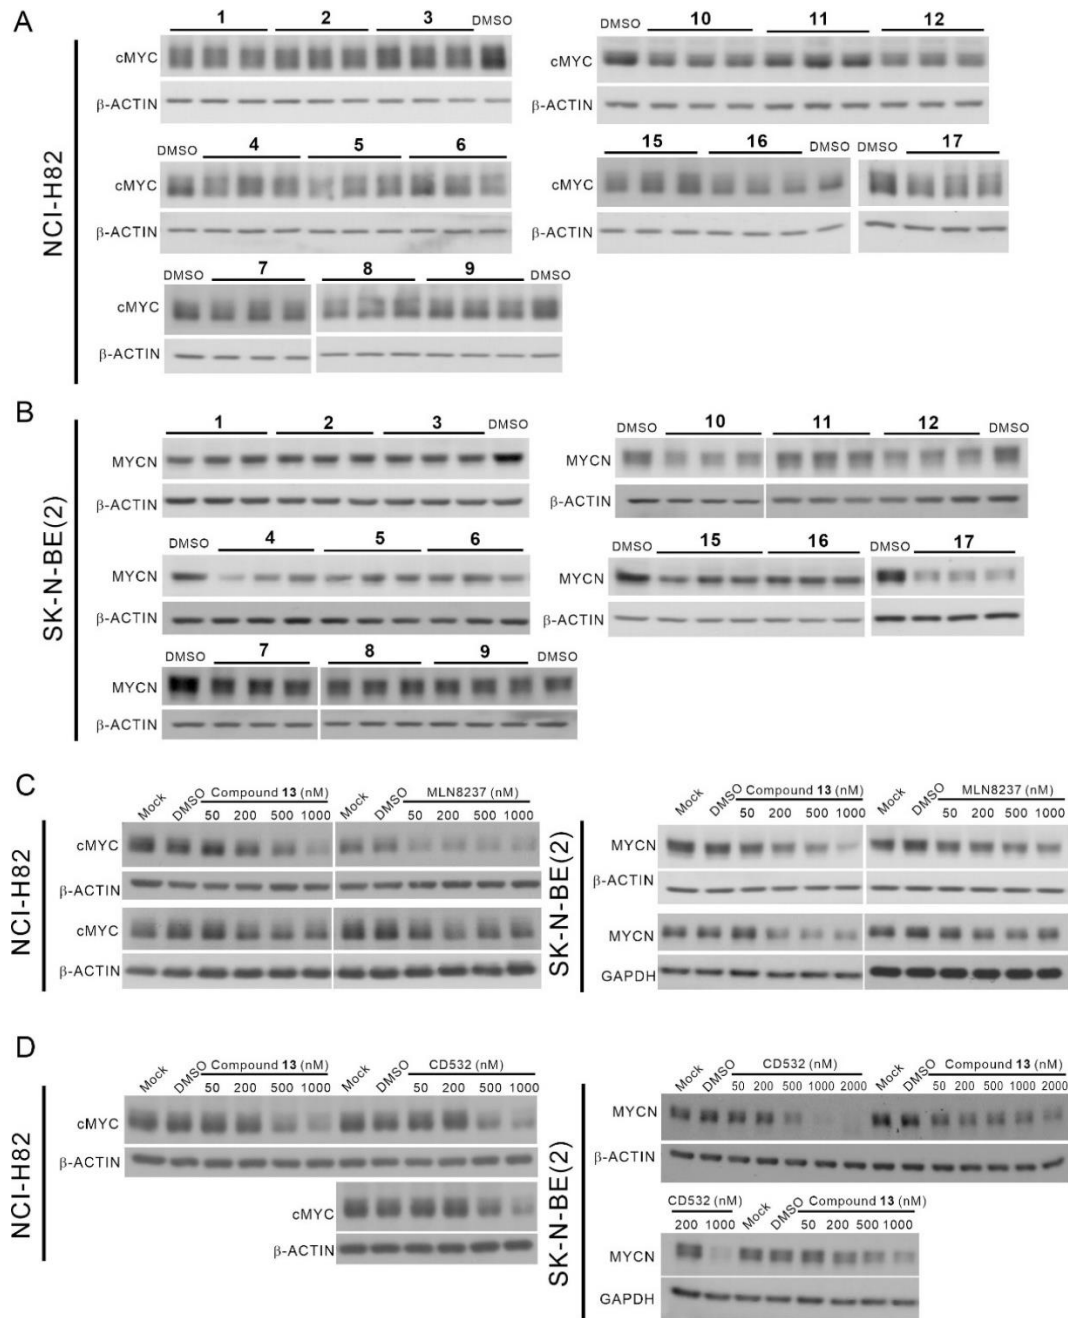

**Figure S1.** (A-C) Western blot analysis for the expression levels of cMYC and MYCN in NCI-H82 and SK-N-BE(2) cells respectively treated with 1.0  $\mu$ M of the indicated compounds, or various concentrations of **13**/MLN8237 for 24 h. The cMYC/MYCN levels undertaken in triplicate were normalized to  $\beta$ -ACTIN or GAPDH, and are presented in [Table 1](#). (D) Western blot analysis for the comparison of cMYC/MYCN protein expression profiles in NCI-H82 and SK-N-BE(2) cells respectively treated with various concentrations of **13** and CD532 for 24 h.

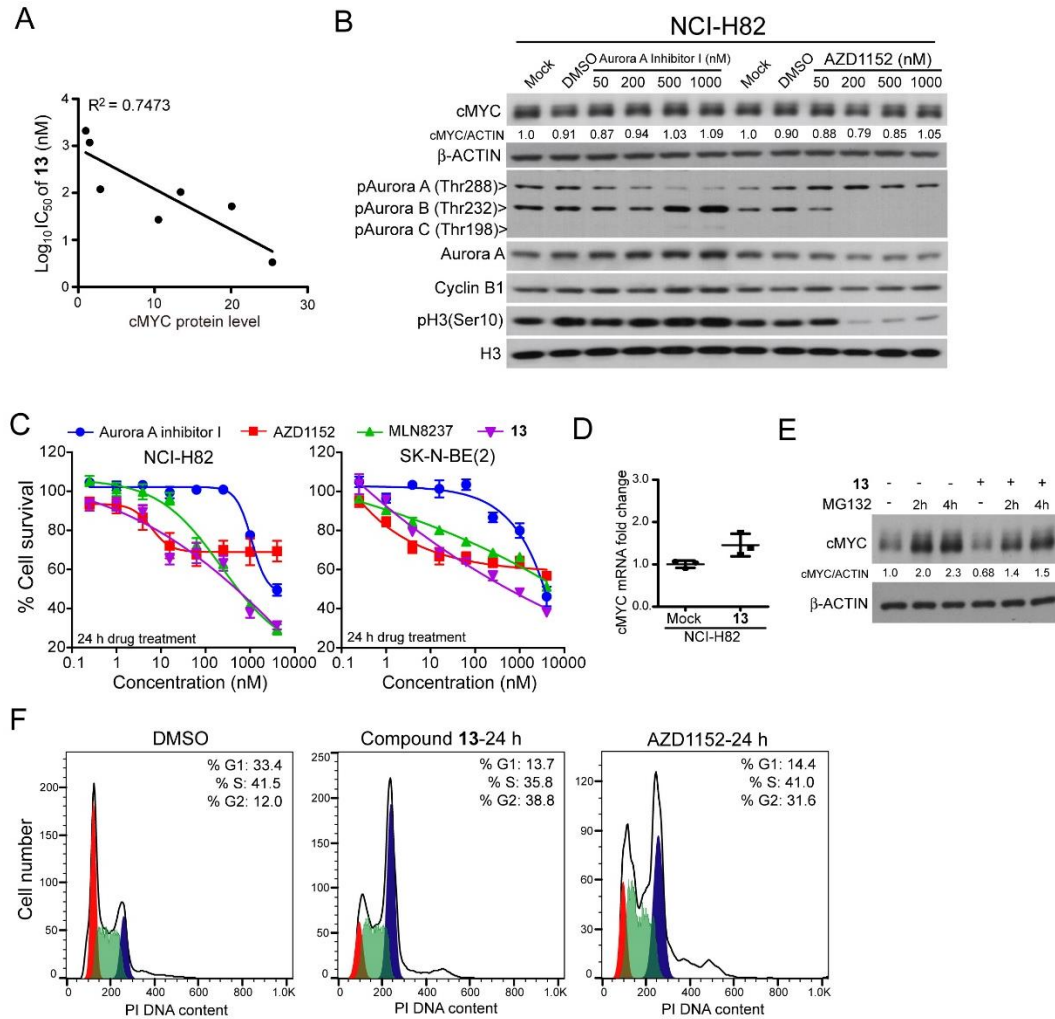

**Figure S2.** (A) Correlation between half growth inhibition concentrations ( $\text{IC}_{50}$ ,  $\text{log}_{10}$  scale) of  $\mathbf{13}$  and relative expression levels of cMYC in the seven SCLC cell lines (i.e. NCI-H82, NCI-H446, NCI-H211, NCI-H524, NCI-H2171, NCI-H146 and NCI-H841) in Figure 2E. The computed coefficient of determination  $R^2$  is 0.7473. (B) Western blot analysis for the expression levels of cMYC, phosphorylated Aurora kinase A/B/C and cell cycle markers Cyclin B1 and pH3(Ser10), in NCI-H82 cells respectively treated with Aurora A inhibitor I and AZD1152 at the indicated concentrations for 24 h. Immunoblotting of  $\beta$ -ACTIN was used as a loading control. Relative expression of cMYC normalized to  $\beta$ -ACTIN was denoted. (C) Percent survival of NCI-H82 and SK-N-BE(2) cells treated with Aurora A inhibitor I, AZD1152,  $\mathbf{13}$ , or MLN8237 for 24 h. (D) Relative mRNA level of cMYC in NCI-H82 mock- or  $\mathbf{13}$ - treated for 24 h. (E) Western blotting analysis for the cMYC protein expression in NCI-H82 cells with/without  $\mathbf{13}$  treatment for 5 h, and in the presence/absence of 1.0  $\mu\text{g}/\text{mL}$  MG132 for 2 or 4 h. Immunoblotting of  $\beta$ -ACTIN was used as a loading control. A slight reduction in cMYC level was observed in NCI-H82 cells treated with  $\mathbf{13}$  for 5 h. (F) Cell cycle analysis of NCI-H82 treated with 0.1% DMSO, 1.0  $\mu\text{M}$  of  $\mathbf{13}$  or 1.0  $\mu\text{M}$  of AZD1152 for 24 h. Cells were fixed in 70% ethanol, stained with propidium iodide (PI)/0.1% Triton X-100 staining solution, and were analyzed using a FACSCalibur<sup>TM</sup> (BD Biosciences). Data were processed by FlowJo<sup>TM</sup> software. Percent of cells in G1, S or G2/M (i.e. G2 in FlowJo<sup>TM</sup> software) phases are denoted on the figure.



Sample Name: 06BP-160-186-50  
Injection from this vial: 1 of 1  
Sample Description:

Vial Number: 102  
Volume: 20.0 ul

Chrom Type: Fixed WL Chromatogram, 254 nm

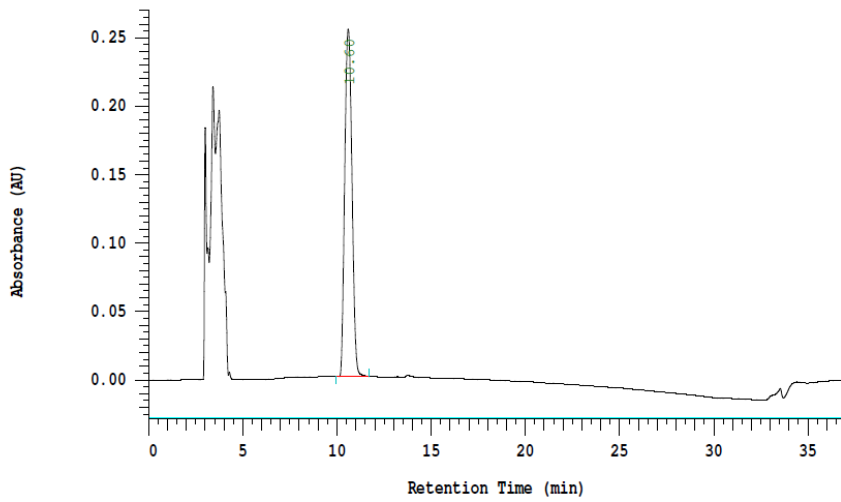

Processing Method: Purity\_37min  
Column Type: Column  
Method Description:

Method Developer: Bob

Peak Quantitation: AREA  
Calculation Method: AREA%

| No. | RT    | Area    | Height | Conc 1  |
|-----|-------|---------|--------|---------|
| 1   | 10.60 | 3357313 | 126883 | 100.000 |
|     |       | 3357313 | 126883 | 100.000 |

Peak rejection level: 0

**Figure S4. NMR and HPLC spectra of compound 2.**  
**(S)-(3-chloro-2-fluorophenyl)(3-((4-((5-methyl-1H-pyrazol-3-yl)amino)-6-(4-methylpiperazin-1-yl)pyrimidin-2-yl)amino)pyrrolidin-1-yl)methanone (2)**

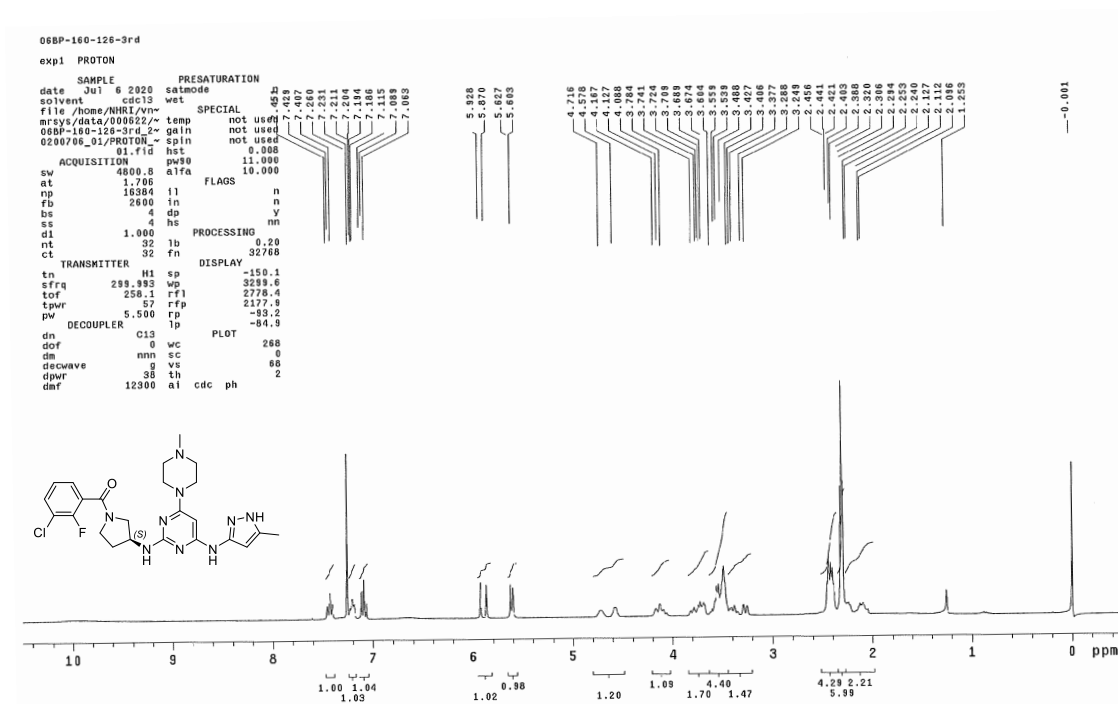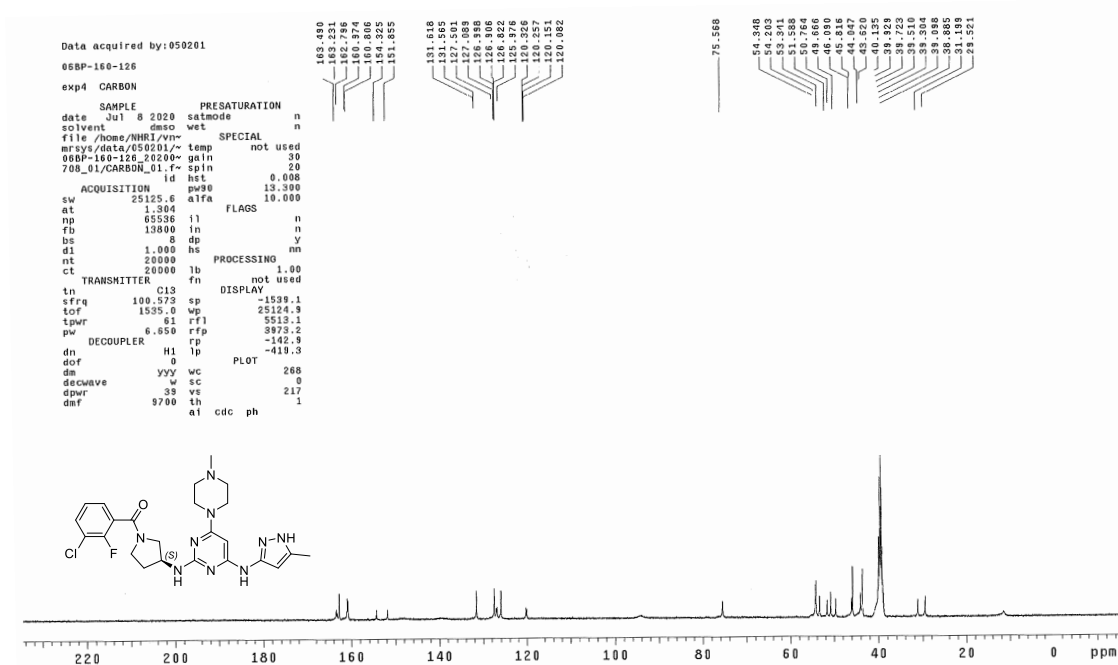

Sample Name: 06BP-160-126-50  
Injection from this vial: 1 of 1  
Sample Description:

Vial Number: 138  
Volume: 20.0 ul

Chrom Type: Fixed WL Chromatogram, 254 nm

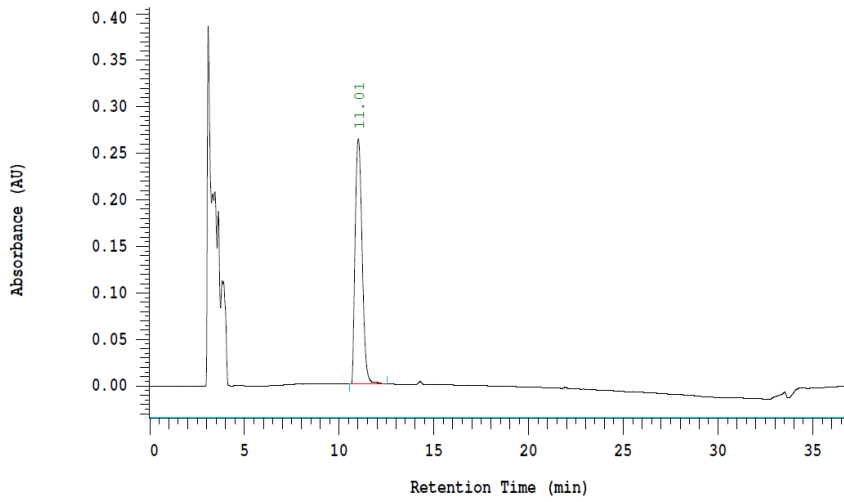

Processing Method: Purity\_37min  
Column Type: Column  
Method Description:

Method Developer: Bob

Peak Quantitation: AREA  
Calculation Method: AREA%

| No. | RT    | Area    | Height | Conc 1  |
|-----|-------|---------|--------|---------|
| 1   | 11.01 | 3333011 | 131560 | 100.000 |
|     |       | 3333011 | 131560 | 100.000 |

Peak rejection level: 0



**Figure S5. NMR and HPLC spectra of compound 3.**  
**(S)-(3-chloro-2-fluorophenyl)(3-((4-(3-(dimethylamino)azetidin-1-yl)-6-((5-methyl-1H-pyrazol-3-yl)amino)pyrimidin-2-yl)amino)pyrrolidin-1-yl)methanone**  
**(3)**

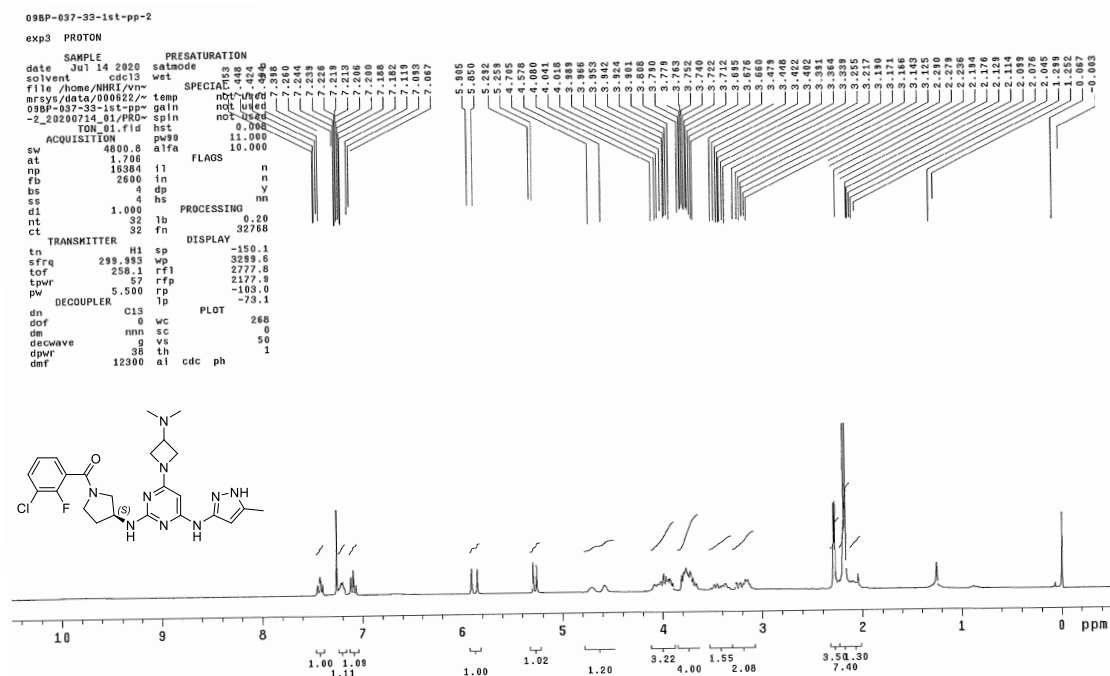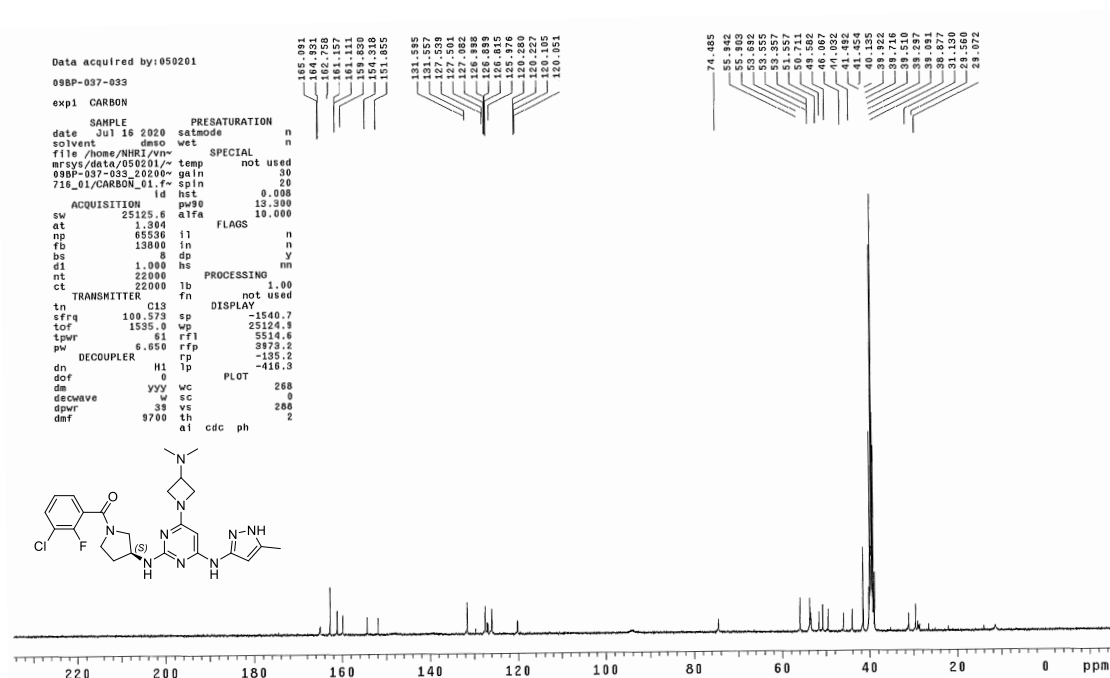

Sample Name: 09BP-037-33-1st-PP-1-50 Vial Number: 128  
 Injection from this vial: 1 of 1 Volume: 20.0 ul  
 Sample Description:

Chrom Type: Fixed WL Chromatogram, 254 nm

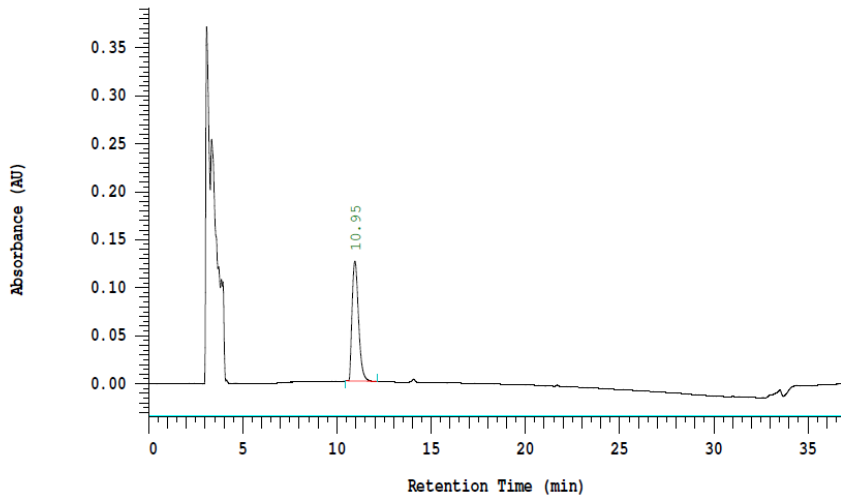

Processing Method: Purity\_37min  
 Column Type: Column Method Developer: Bob  
 Method Description:

Peak Quantitation: AREA  
 Calculation Method: AREA%

| No. | RT    | Area    | Height | Conc 1  |
|-----|-------|---------|--------|---------|
| 1   | 10.95 | 1468768 | 62258  | 100.000 |
|     |       | 1468768 | 62258  | 100.000 |

Peak rejection level: 0

**Figure S6. NMR and HPLC spectra of compound 4.**  
**(3-chloro-2-fluorophenyl)((S)-3-((4-((S)-3-(dimethylamino)pyrrolidin-1-yl)-6-((5-methyl-1H-pyrazol-3-yl)amino)pyrimidin-2-yl)amino)pyrrolidin-1-yl)methanone**  
**(4)**

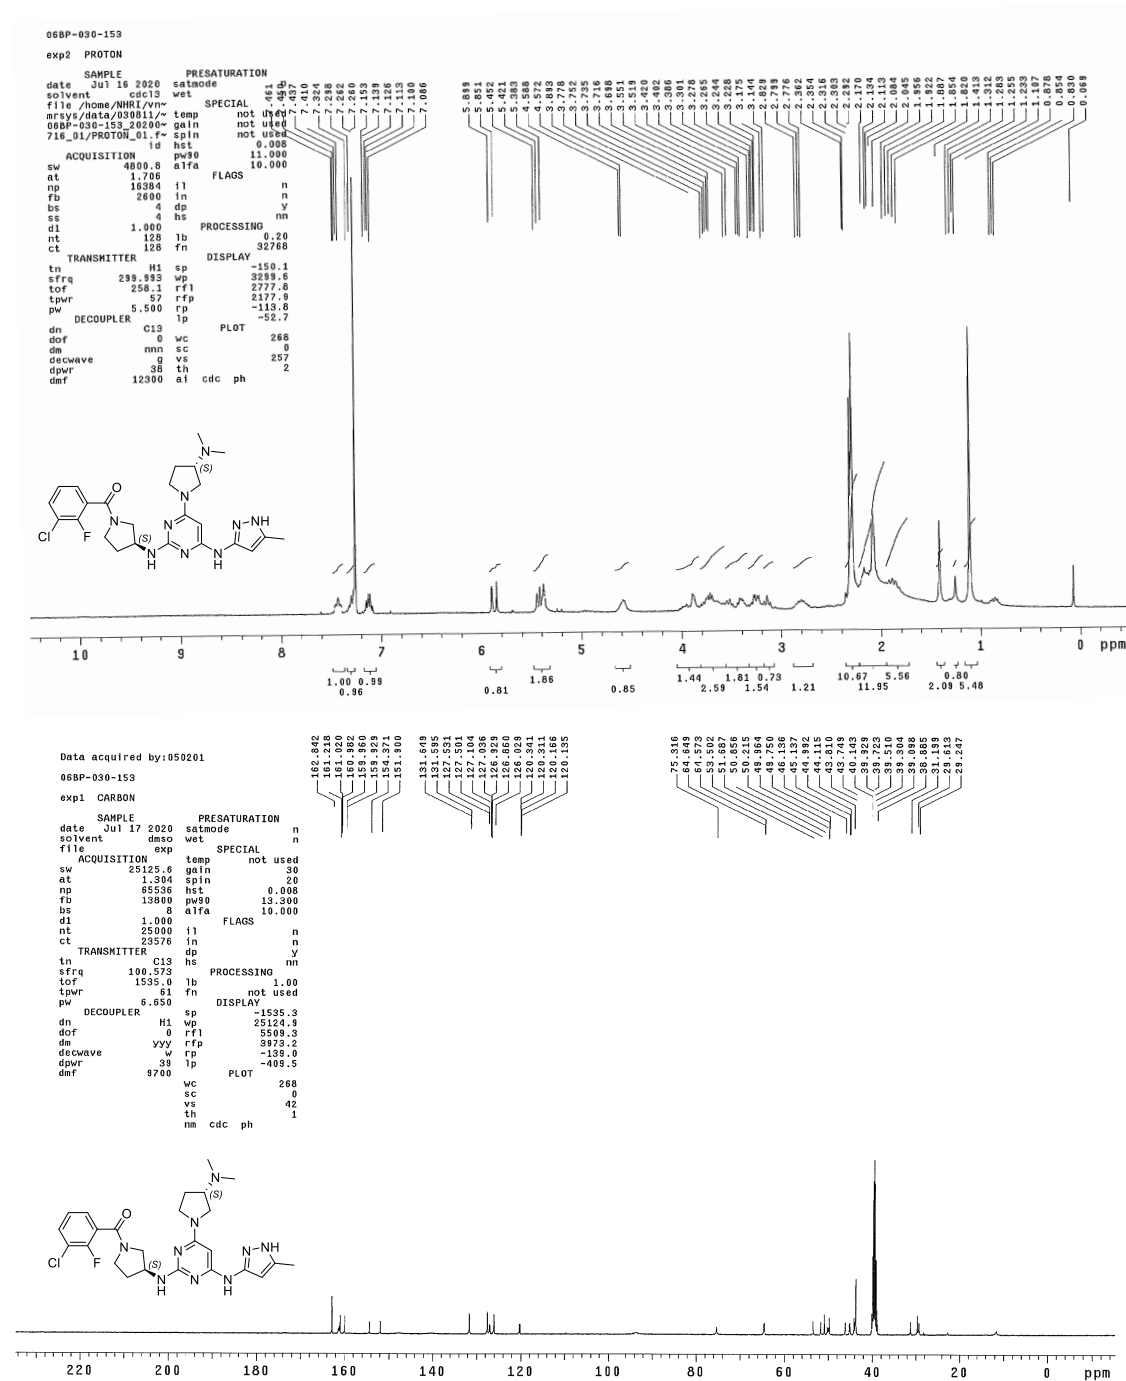

Sample Name: 06BP-030-153-50  
Injection from this vial: 1 of 1  
Sample Description:

Vial Number: 142  
Volume: 20.0 ul

Chrom Type: Fixed WL Chromatogram, 254 nm

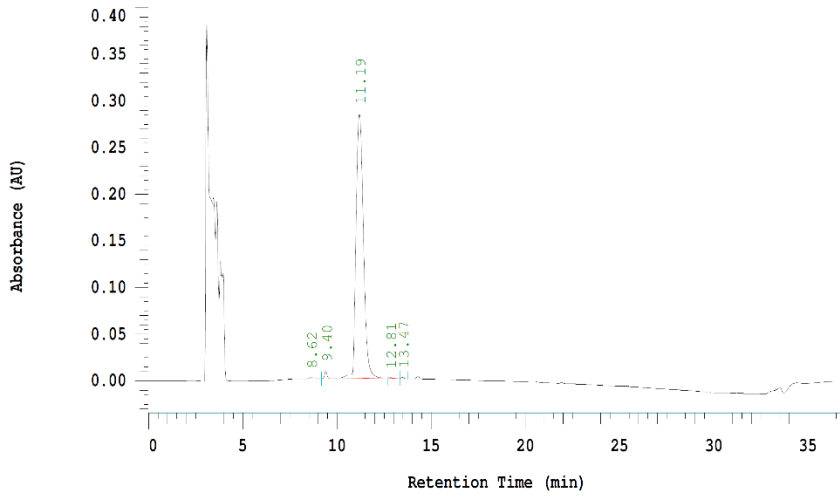

Processing Method: Purity\_37min  
Column Type: Column  
Method Description: Method Developer: Bob

Peak Quantitation: AREA  
Calculation Method: AREA%

| No. | RT    | Area    | Height | Conc 1  |
|-----|-------|---------|--------|---------|
| 1   | 8.62  | 14326   | 556    | 0.367   |
| 2   | 9.40  | 37144   | 4226   | 0.952   |
| 3   | 11.19 | 3842063 | 141755 | 98.474  |
| 4   | 12.81 | 1836    | 215    | 0.047   |
| 5   | 13.47 | 6239    | 743    | 0.160   |
|     |       | 3901608 | 147495 | 100.000 |

Peak rejection level: 0



Sample Name: 06BP-030-154-50  
Injection from this vial: 1 of 1  
Sample Description:

Vial Number: 150  
Volume: 20.0 ul

Chrom Type: Fixed WL Chromatogram, 254 nm

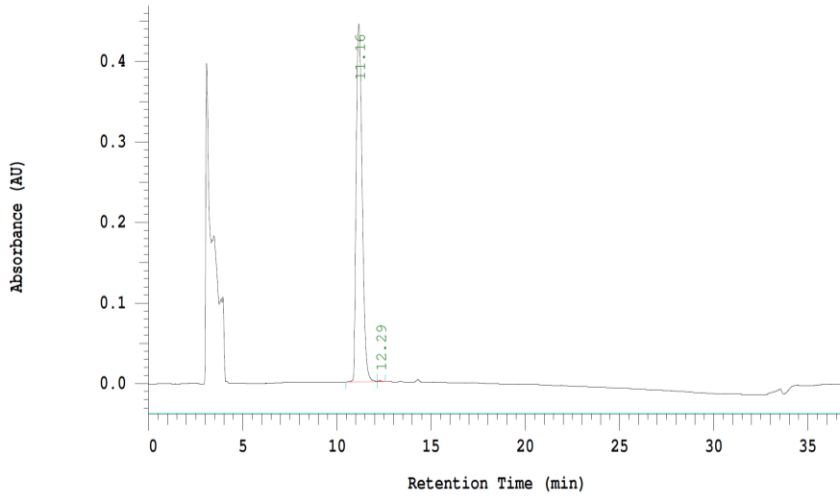

Processing Method: Purity\_37min  
Column Type: Column  
Method Description: Method Developer: Bob

Peak Quantitation: AREA  
Calculation Method: AREA%

| No. | RT    | Area    | Height | Conc 1  |
|-----|-------|---------|--------|---------|
| 1   | 11.16 | 4852782 | 221908 | 99.906  |
| 2   | 12.29 | 4585    | 464    | 0.094   |
|     |       | 4857367 | 222372 | 100.000 |

Peak rejection level: 0

**Figure S8. NMR and HPLC spectra of compound 6.**  
**(S)-3-((4-(4-ethylpiperazin-1-yl)-6-((5-methyl-1H-pyrazol-3-yl)amino)pyrimidin-2-yl)amino)pyrrolidin-1-yl)(phenyl)methanone (6)**

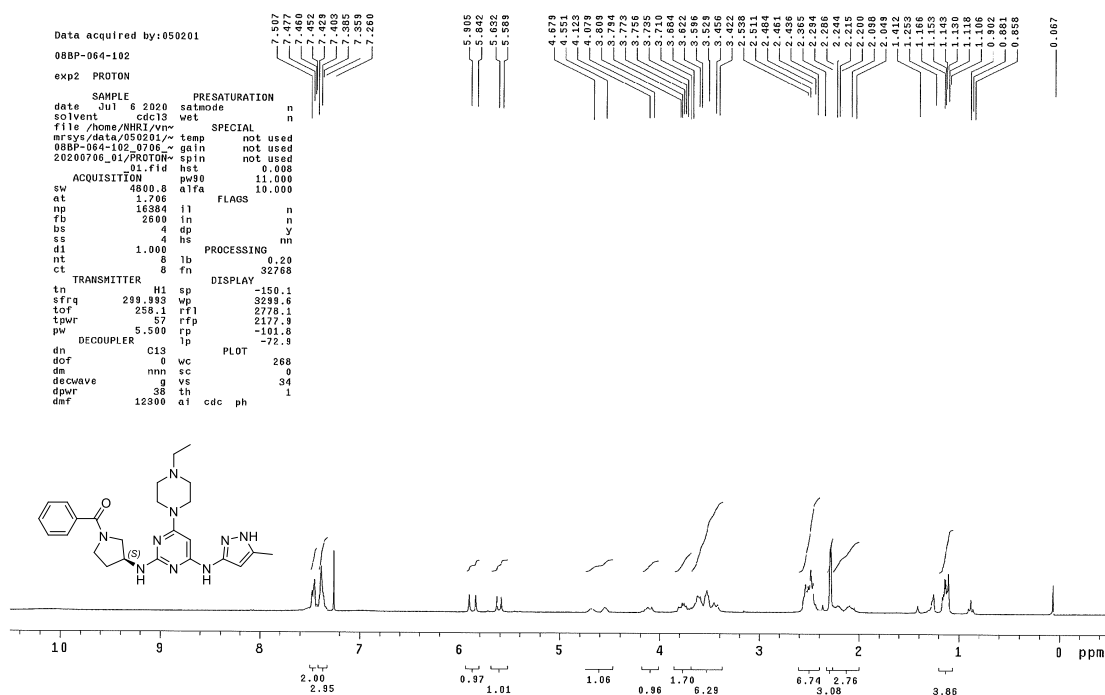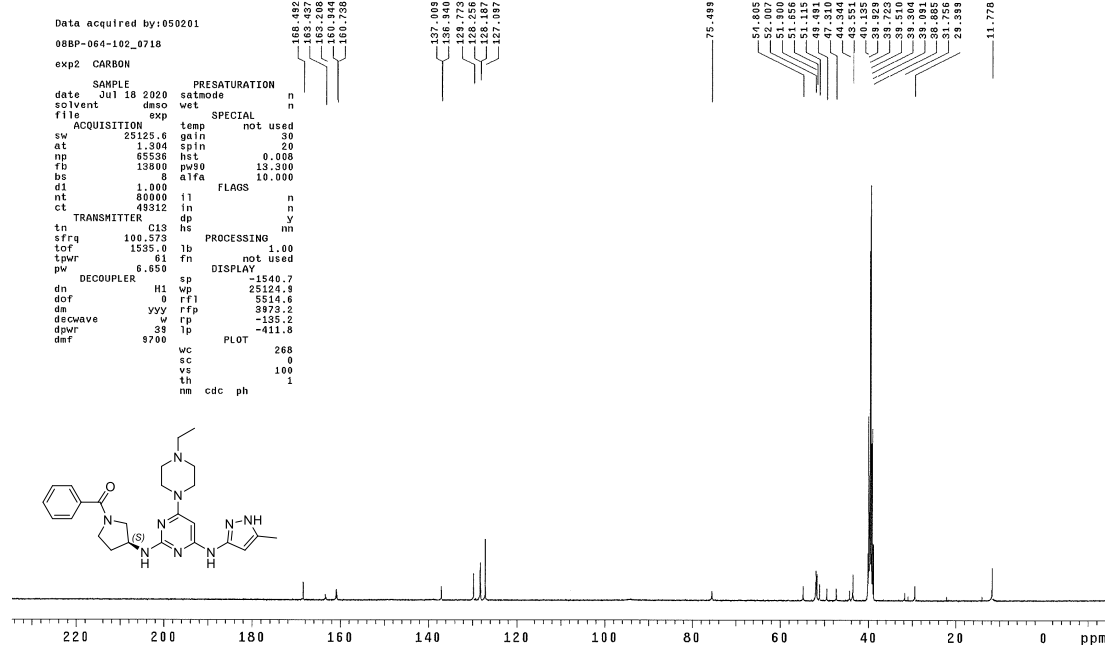

Sample Name: 08BP-064-102-50  
 Injection from this vial: 1 of 1  
 Sample Description:

Vial Number: 4  
 Volume: 20.0 ul

Chrom Type: Fixed WL Chromatogram, 254 nm

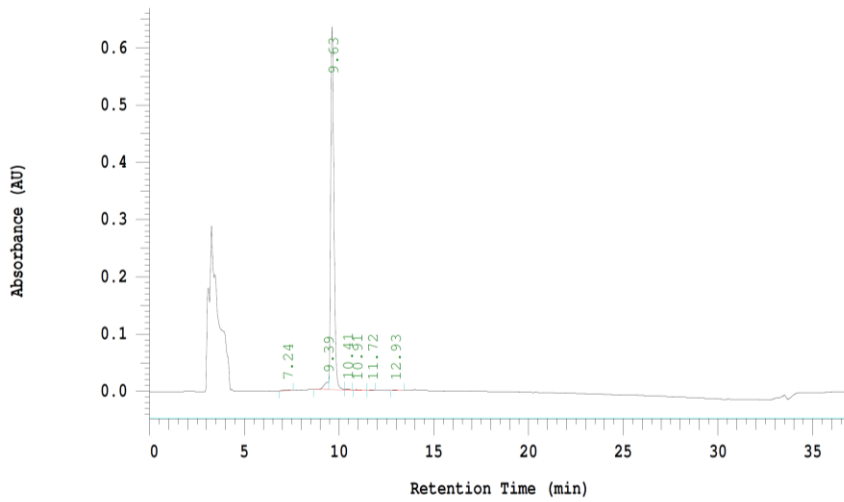

Processing Method: Purity\_37min  
 Column Type: Column  
 Method Description:

Method Developer: Bob

Peak Quantitation: AREA  
 Calculation Method: AREA%

| No. | RT    | Area    | Height | Conc 1  |
|-----|-------|---------|--------|---------|
| 1   | 7.24  | 10782   | 527    | 0.279   |
| 2   | 9.39  | 106876  | 6567   | 2.765   |
| 3   | 9.63  | 3726693 | 316638 | 96.407  |
| 4   | 10.41 | 7022    | 568    | 0.182   |
| 5   | 10.91 | 5611    | 421    | 0.145   |
| 6   | 11.72 | 3650    | 306    | 0.094   |
| 7   | 12.93 | 4944    | 348    | 0.128   |
|     |       | 3865578 | 325375 | 100.000 |

Peak rejection level: 0



**Figure S9. NMR and HPLC spectra of compound 7.**  
**(S)-(4-chlorophenyl)(3-((4-(4-ethylpiperazin-1-yl)-6-((5-methyl-1H-pyrazol-3-yl)amino)pyrimidin-2-yl)amino)pyrrolidin-1-yl)methanone (7)**

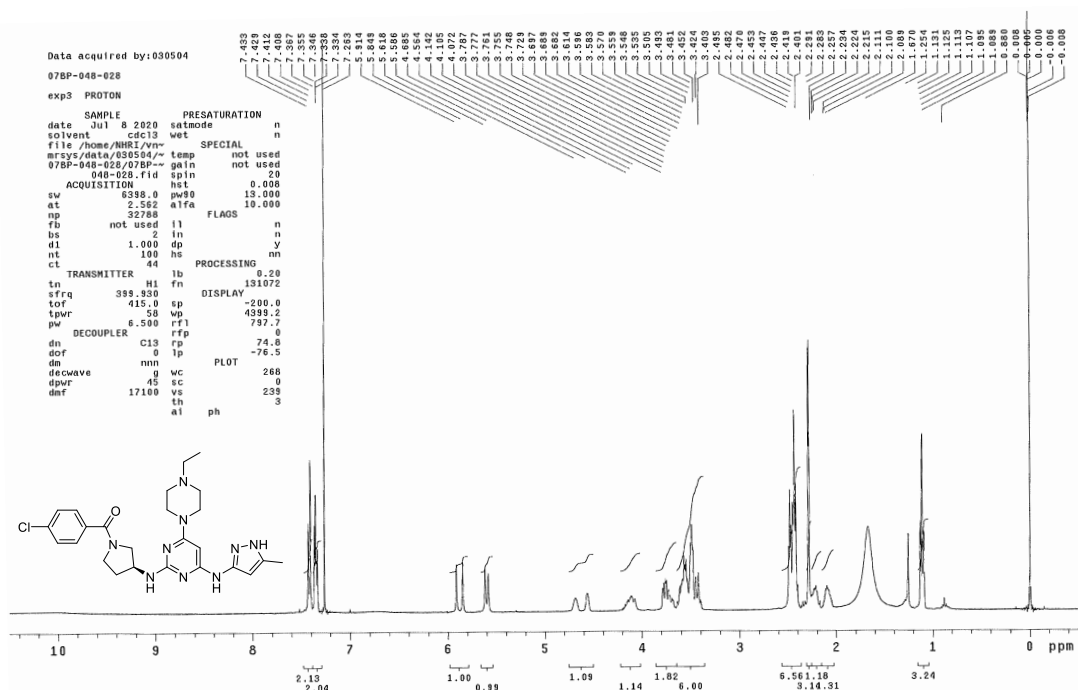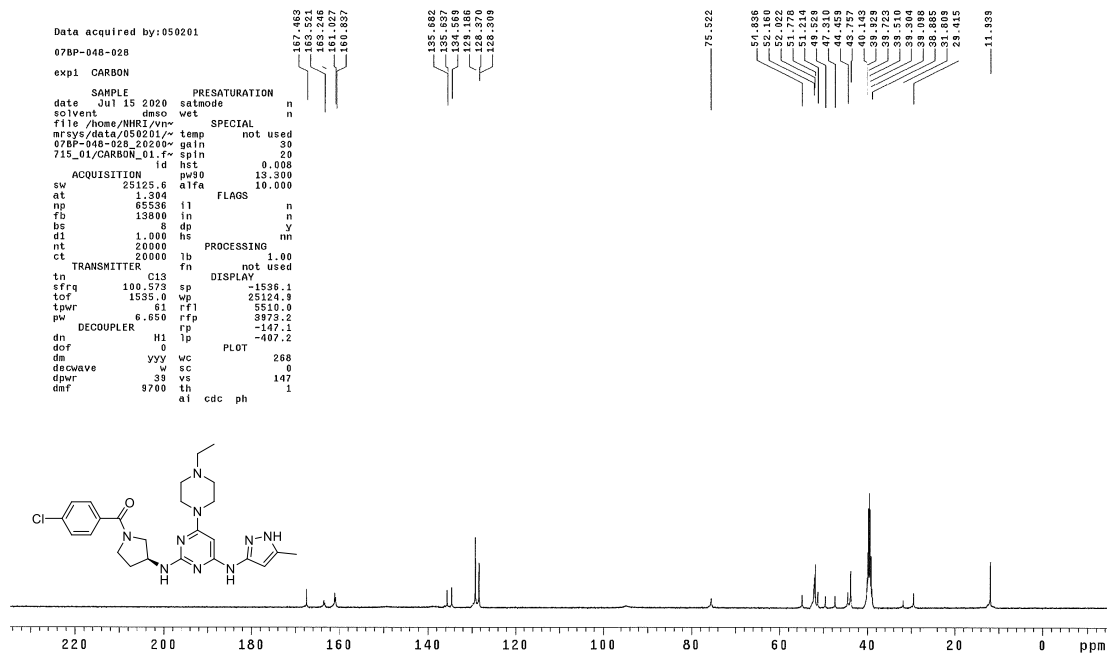

Sample Name: 07BP-048-028-50  
Injection from this vial: 1 of 1  
Sample Description:

Vial Number: 108  
Volume: 20.0 ul

Chrom Type: Fixed WL Chromatogram, 254 nm

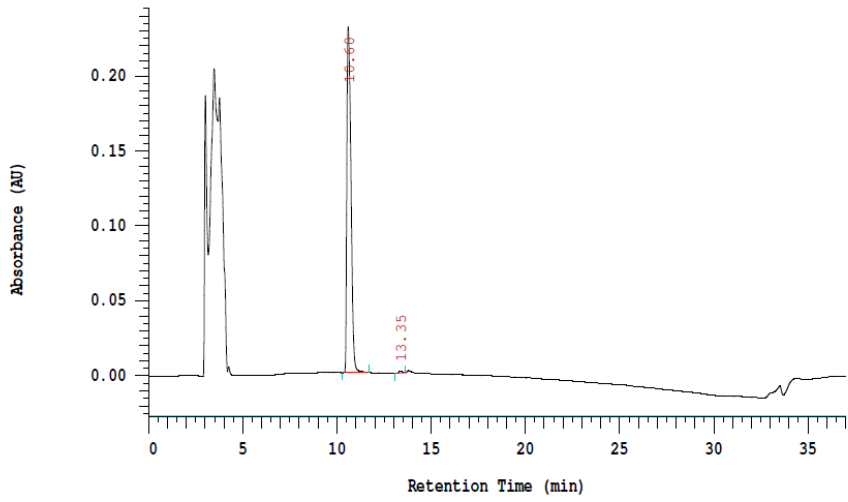

Processing Method: Purity\_37min  
Column Type: Column  
Method Description: Method Developer: Bob

Peak Quantitation: AREA  
Calculation Method: AREA%

| No. | RT    | Area    | Height | Conc 1  |
|-----|-------|---------|--------|---------|
| 1   | 10.60 | 1721077 | 115221 | 99.629  |
| 2   | 13.35 | 6406    | 514    | 0.371   |
|     |       | 1727483 | 115735 | 100.000 |

Peak rejection level: 0



Sample Name: 06BP-030-159-50  
Injection from this vial: 1 of 1  
Sample Description:

Vial Number: 110  
Volume: 20.0 ul

Chrom Type: Fixed WL Chromatogram, 254 nm

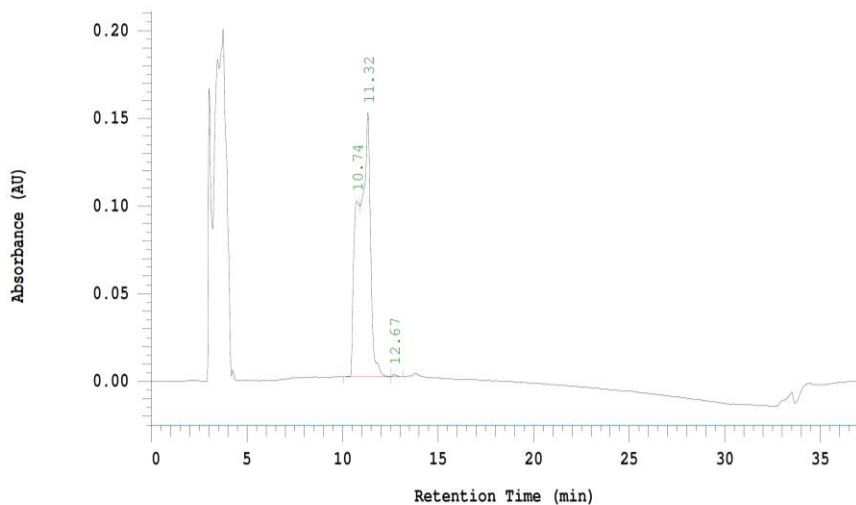

Processing Method: Purity\_37min  
Column Type: Column  
Method Description:

Method Developer: Bob

Peak Quantitation: AREA  
Calculation Method: AREA%

| No. | RT    | Area    | Height | Conc 1  |
|-----|-------|---------|--------|---------|
| 1   | 10.74 | 1043036 | 50100  | 32.101  |
| 2   | 11.32 | 2197890 | 75149  | 67.644  |
| 3   | 12.67 | 8257    | 590    | 0.254   |
|     |       | 3249183 | 125839 | 100.000 |

Peak rejection level: 0

**Figure S11. NMR and HPLC spectra of compound 9.**  
**(S)-(4-chloro-2-methylphenyl)(3-((4-(4-ethylpiperazin-1-yl)-6-((5-methyl-1H-pyrazol-3-yl)amino)pyrimidin-2-yl)amino)pyrrolidin-1-yl)methanone (9)**

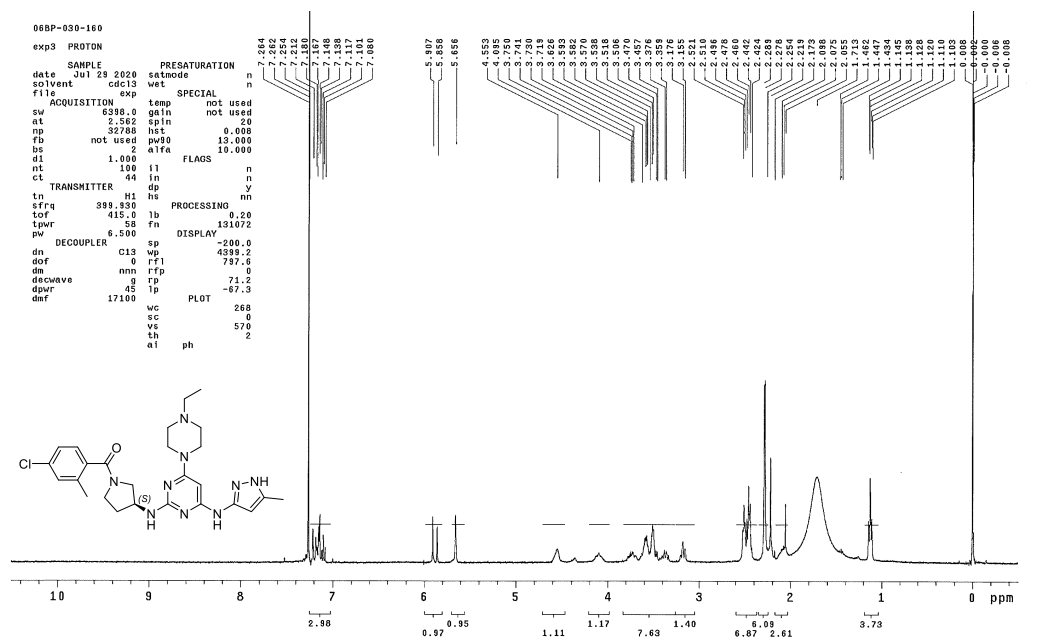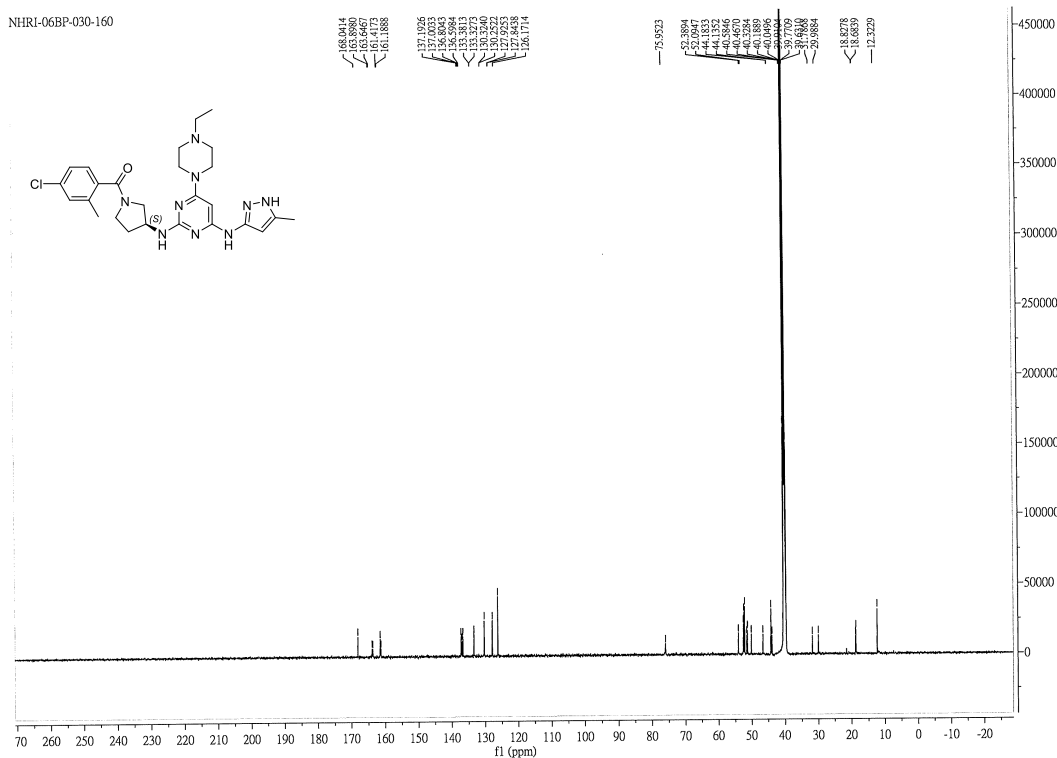

Sample Name: 06BP-030-160-50  
Injection from this vial: 1 of 1  
Sample Description:

Vial Number: 64  
Volume: 20.0 ul

Chrom Type: Fixed WL Chromatogram, 254 nm

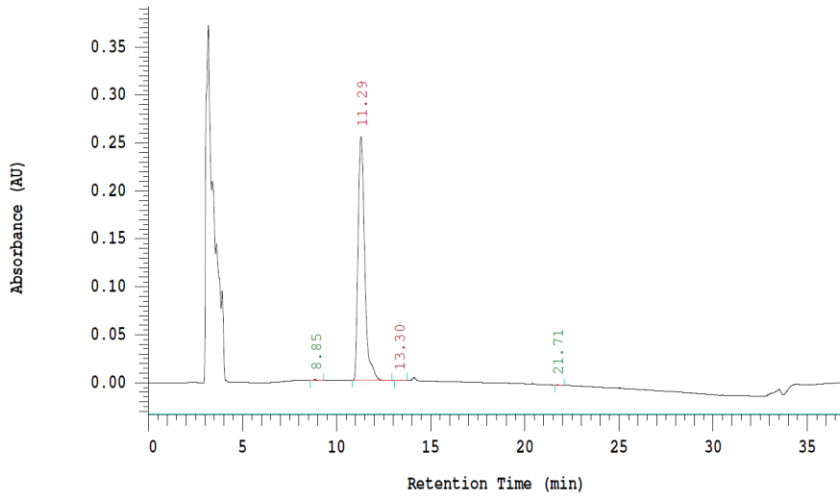

Processing Method: Purity\_37min  
Column Type: Column  
Method Description: Method Developer: Bob

Peak Quantitation: AREA  
Calculation Method: AREA%

| No. | RT    | Area    | Height | Conc 1  |
|-----|-------|---------|--------|---------|
| 1   | 8.85  | 6463    | 640    | 0.208   |
| 2   | 11.29 | 3096628 | 127017 | 99.646  |
| 3   | 13.30 | 2501    | 147    | 0.080   |
| 4   | 21.71 | 2048    | 202    | 0.066   |
|     |       | 3107640 | 128006 | 100.000 |

Peak rejection level: 0



Sample Name: 06BP-030-165B-50  
Injection from this vial: 1 of 1  
Sample Description:

Vial Number: 76  
Volume: 20.0 ul

Chrom Type: Fixed WL Chromatogram, 254 nm

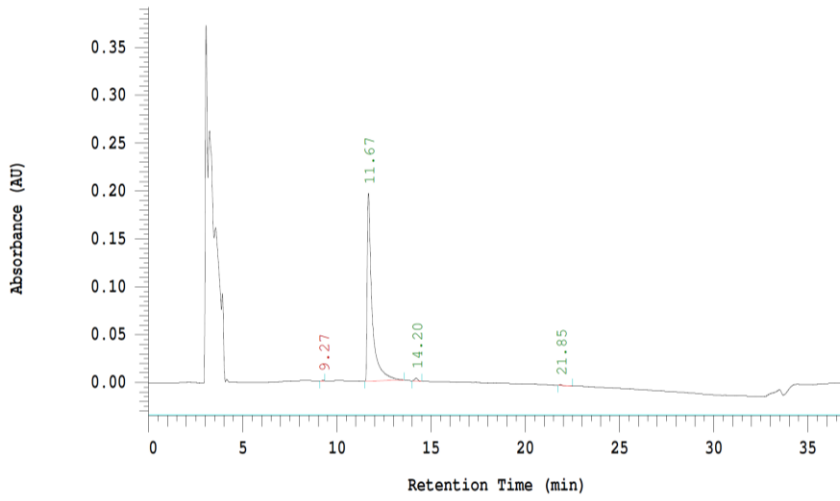

Processing Method: Purity\_37min  
Column Type: Column  
Method Description:

Method Developer: Bob

Peak Quantitation: AREA  
Calculation Method: AREA%

| No. | RT    | Area    | Height | Conc 1  |
|-----|-------|---------|--------|---------|
| 1   | 9.27  | 935     | 129    | 0.053   |
| 2   | 11.67 | 1747304 | 97958  | 98.786  |
| 3   | 14.20 | 16524   | 1525   | 0.934   |
| 4   | 21.85 | 4014    | 362    | 0.227   |
|     |       | 1768777 | 99974  | 100.000 |

Peak rejection level: 0





Sample Name: 06BP-030-158-50  
 Injection from this vial: 1 of 1  
 Sample Description:

Vial Number: 62  
 Volume: 20.0 ul

Chrom Type: Fixed WL Chromatogram, 254 nm

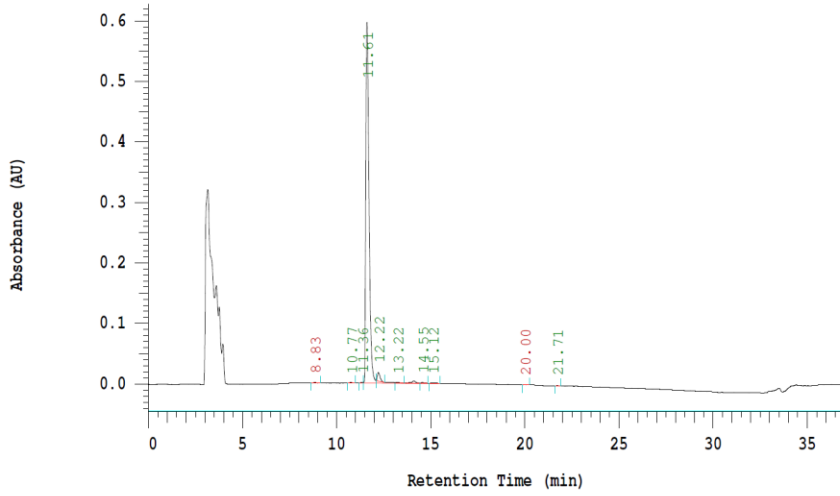

Processing Method: Purity\_37min  
 Column Type: Column  
 Method Description:

Method Developer: Bob

Peak Quantitation: AREA  
 Calculation Method: AREA%

| No. | RT    | Area    | Height | Conc 1  |
|-----|-------|---------|--------|---------|
| 1   | 8.83  | 3461    | 378    | 0.096   |
| 2   | 10.77 | 3020    | 230    | 0.083   |
| 3   | 11.36 | 2568    | 352    | 0.071   |
| 4   | 11.61 | 3523496 | 297667 | 97.327  |
| 5   | 12.22 | 69811   | 7172   | 1.928   |
| 6   | 13.22 | 4761    | 511    | 0.132   |
| 7   | 14.55 | 5766    | 486    | 0.159   |
| 8   | 15.12 | 3168    | 170    | 0.088   |
| 9   | 20.00 | 1436    | 192    | 0.040   |
| 10  | 21.71 | 2760    | 328    | 0.076   |
|     |       | 3620247 | 307486 | 100.000 |

Peak rejection level: 0

Figure S14. NMR and HPLC spectra of compound 12.

(*S*)-(5-chloro-2-fluorophenyl)(3-((4-(4-ethylpiperazin-1-yl)-6-((5-methyl-1H-pyrazol-3-yl)amino)pyrimidin-2-yl)amino)pyrrolidin-1-yl)methanone (12)

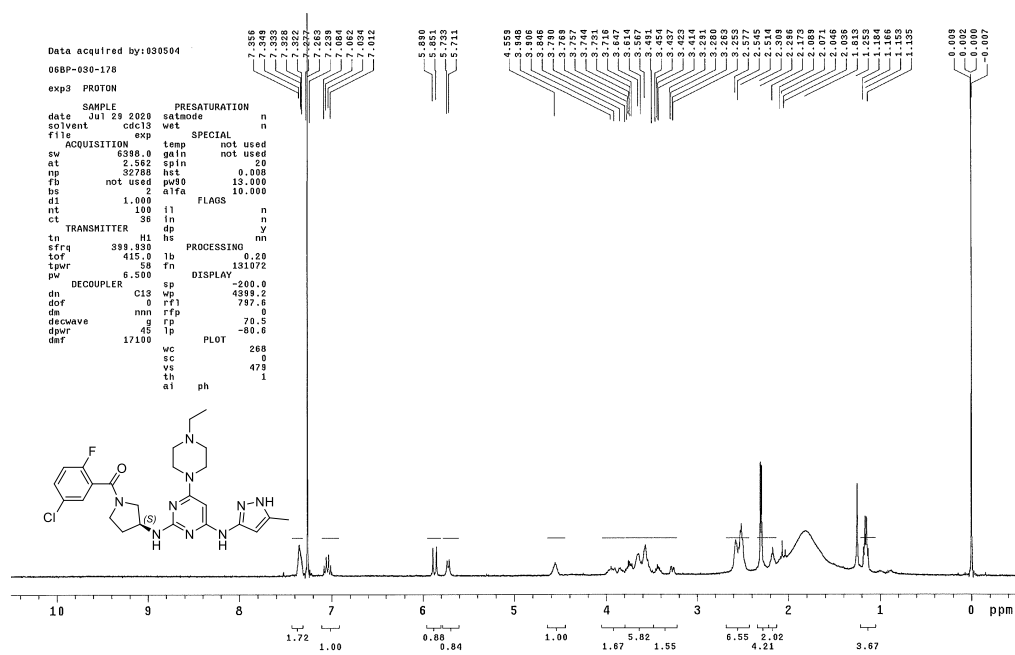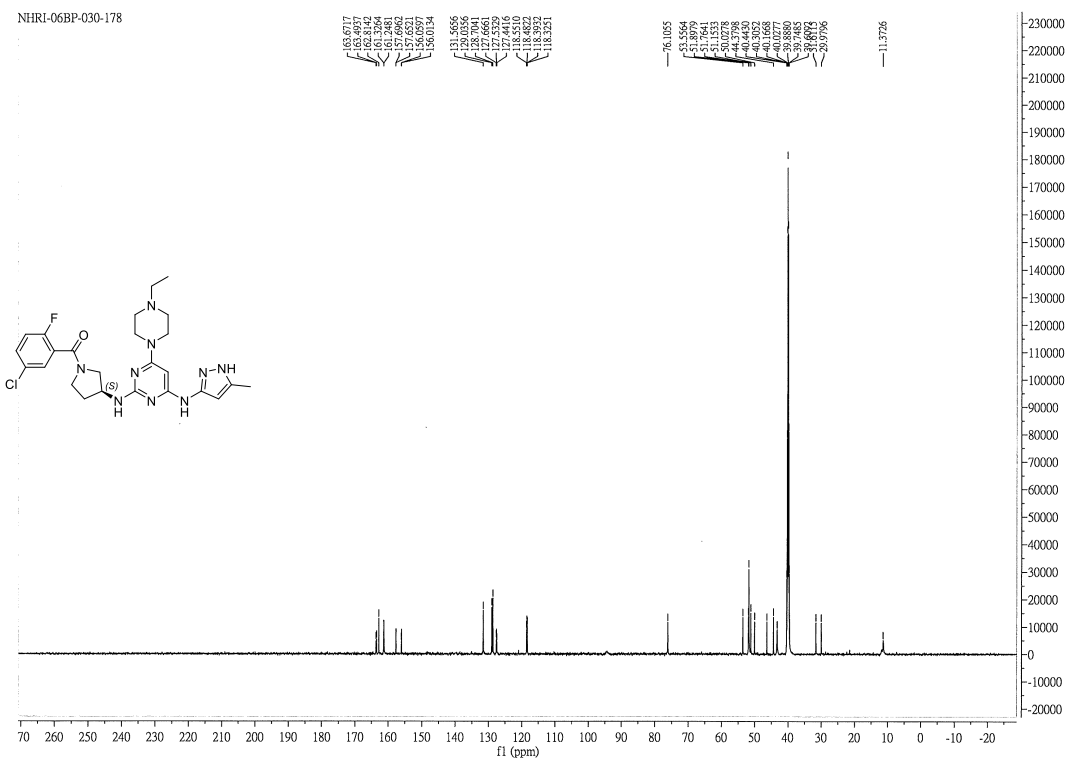

Sample Name: 06BP-030-178-50  
Injection from this vial: 1 of 1  
Sample Description:

Vial Number: 66  
Volume: 20.0 ul

Chrom Type: Fixed WL Chromatogram, 254 nm

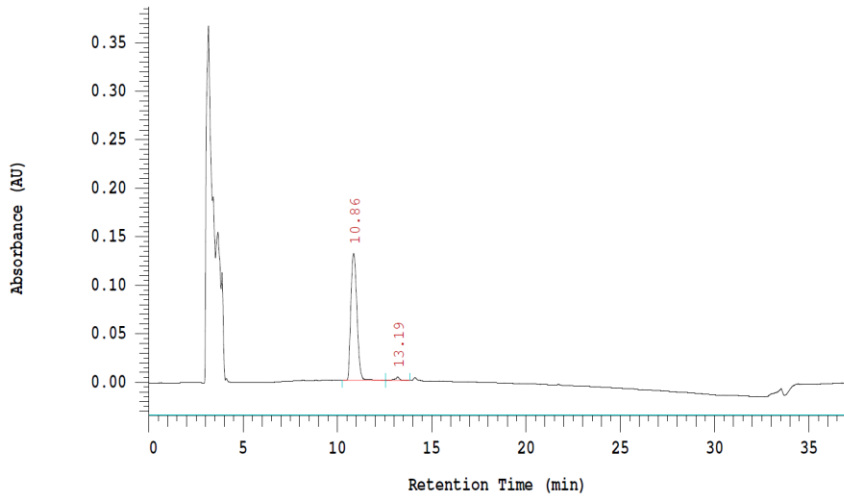

Processing Method: Purity\_37min  
Column Type: Column  
Method Description:

Method Developer: Bob

Peak Quantitation: AREA  
Calculation Method: AREA%

| No. | RT    | Area    | Height | Conc 1  |
|-----|-------|---------|--------|---------|
| 1   | 10.86 | 1451846 | 65396  | 97.888  |
| 2   | 13.19 | 31331   | 1831   | 2.112   |
|     |       | 1483177 | 67227  | 100.000 |

Peak rejection level: 0

Figure S15. NMR and HPLC spectra of compound 13.

(*S*)-(4-chloro-2-fluorophenyl)(3-((4-(4-ethylpiperazin-1-yl)-6-((5-methyl-1H-pyrazol-3-yl)amino)pyrimidin-2-yl)amino)pyrrolidin-1-yl)methanone (13)

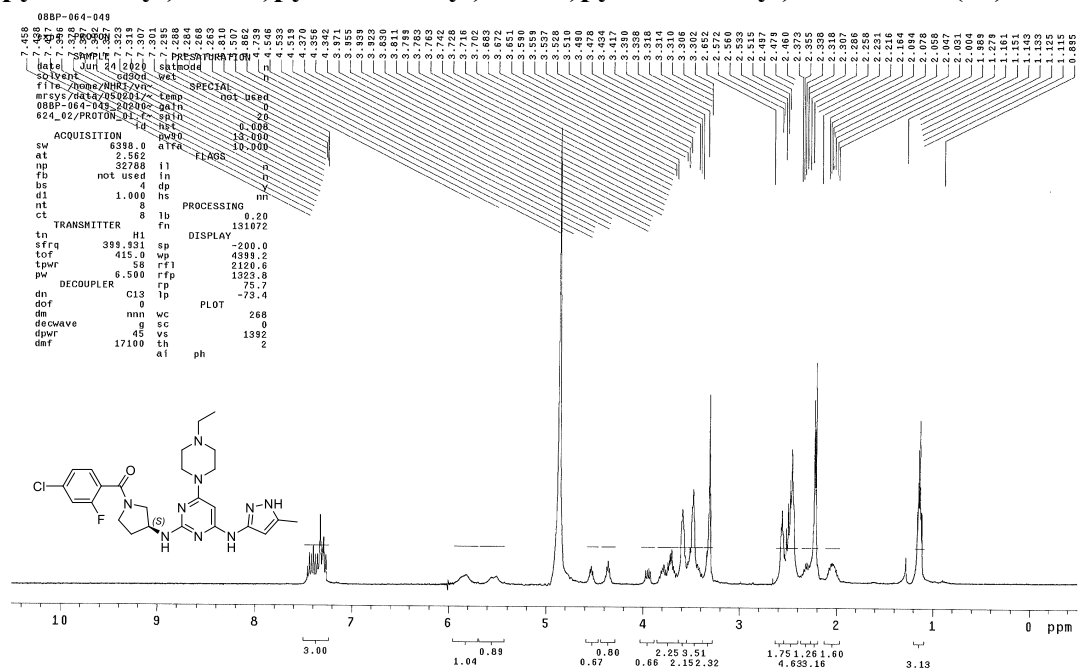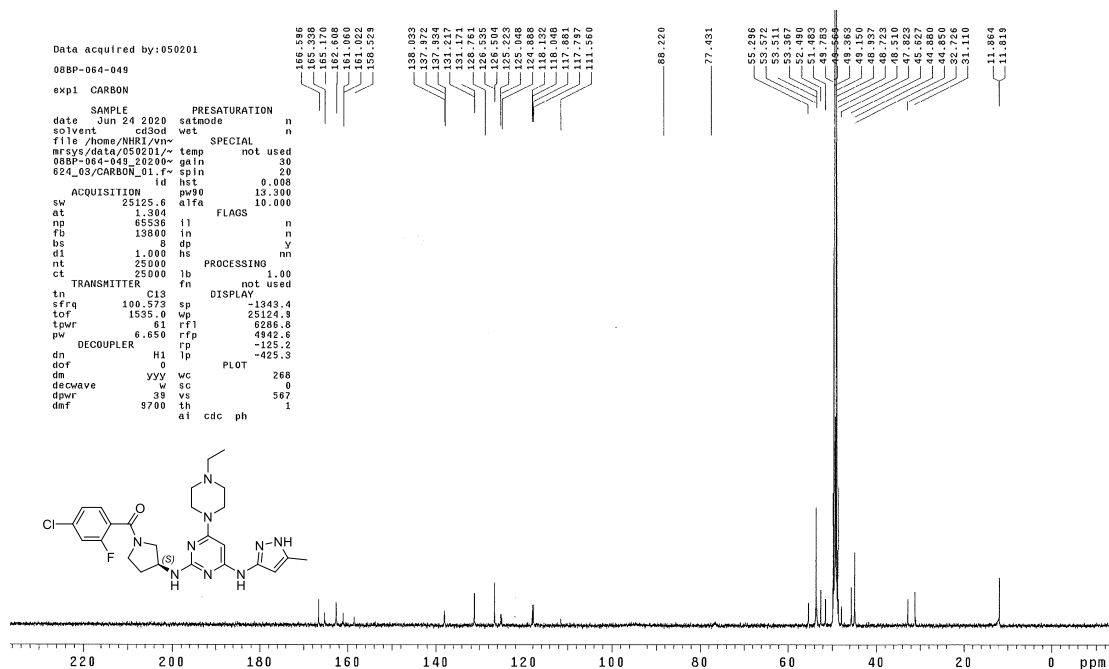

Sample Name: 08BP-064-049-50  
Injection from this vial: 1 of 1  
Sample Description:

Vial Number: 160  
Volume: 20.0 ul

Chrom Type: Fixed WL Chromatogram, 254 nm

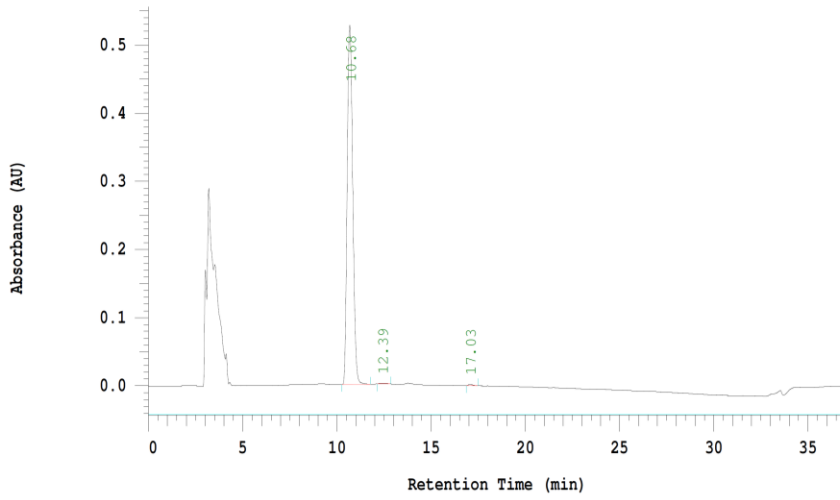

Processing Method: Purity\_37min  
Column Type: Column  
Method Description:

Method Developer: Bob

Peak Quantitation: AREA  
Calculation Method: AREA%

| No. | RT    | Area    | Height | Conc 1  |
|-----|-------|---------|--------|---------|
| 1   | 10.68 | 5307798 | 263279 | 99.573  |
| 2   | 12.39 | 6130    | 232    | 0.115   |
| 3   | 17.03 | 16648   | 984    | 0.312   |
|     |       | 5330576 | 264495 | 100.000 |

Peak rejection level: 0

**Figure S16. NMR and HPLC spectra of compound 14.**  
**(S)-3-((4-(4-ethylpiperazin-1-yl)-6-((5-methyl-1H-pyrazol-3-yl)amino)pyrimidin-2-yl)amino)pyrrolidin-1-yl)(2-fluoro-4-(trifluoromethyl)phenyl)methanone (14)**

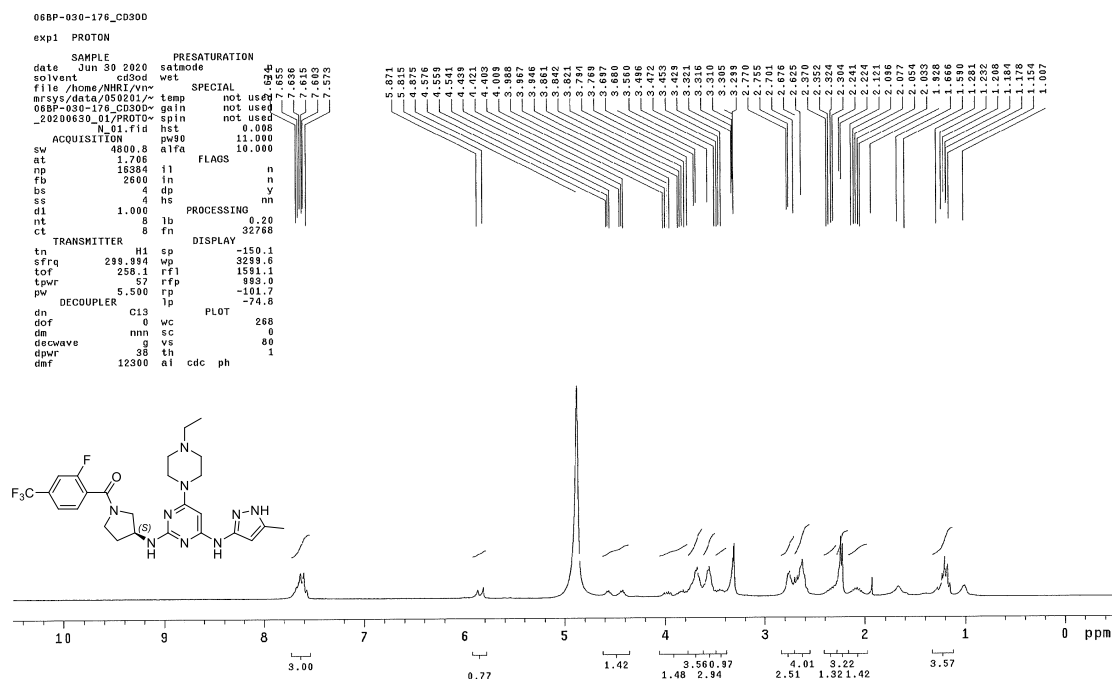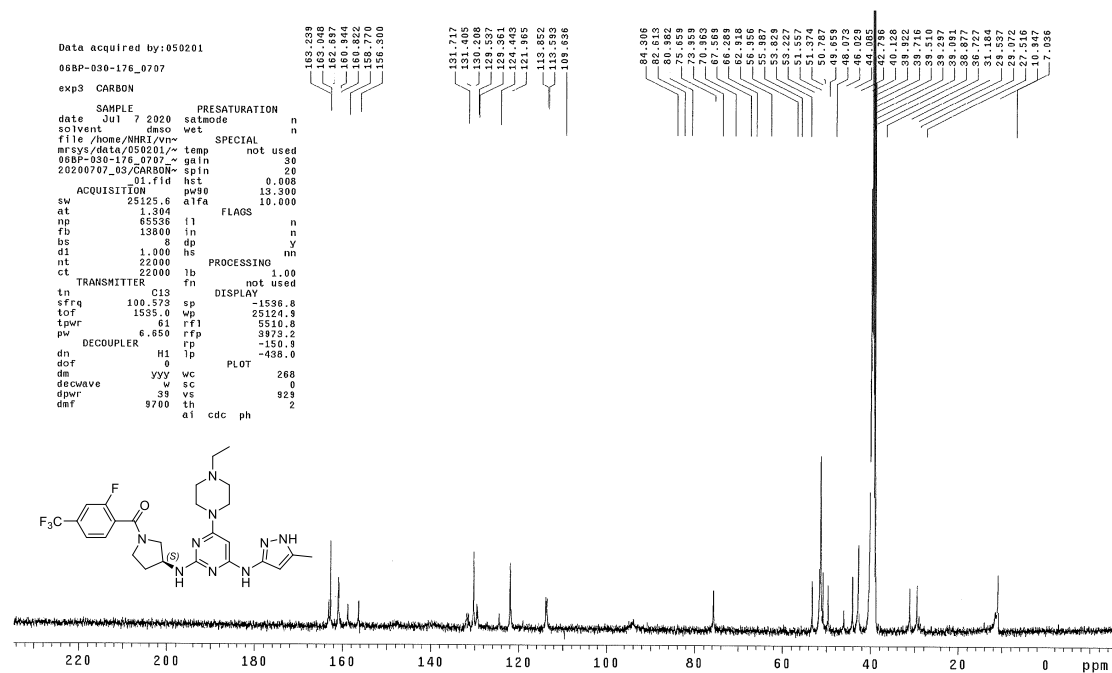

Sample Name: 06BP-030-176-50  
 Injection from this vial: 1 of 1  
 Sample Description:

Vial Number: 116  
 Volume: 20.0 ul

Chrom Type: Fixed WL Chromatogram, 254 nm

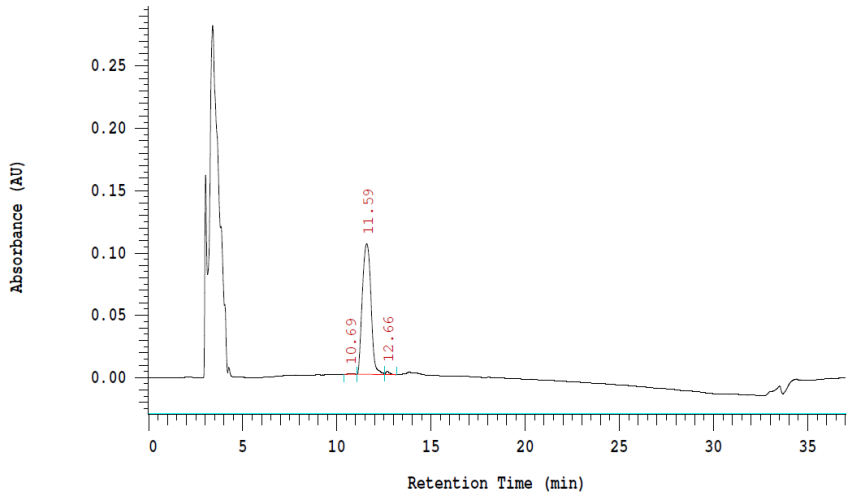

Processing Method: Purity\_37min  
 Column Type: Column  
 Method Description: Method Developer: Bob

Peak Quantitation: AREA  
 Calculation Method: AREA%

| No. | RT    | Area    | Height | Conc 1  |
|-----|-------|---------|--------|---------|
| 1   | 10.69 | 4455    | 175    | 0.264   |
| 2   | 11.59 | 1665806 | 52411  | 98.605  |
| 3   | 12.66 | 19113   | 1360   | 1.131   |
|     |       | 1689374 | 53946  | 100.000 |

Peak rejection level: 0





Sample Name: 06BP-030-181-50  
Injection from this vial: 1 of 1  
Sample Description:

Vial Number: 120  
Volume: 20.0 ul

Chrom Type: Fixed WL Chromatogram, 254 nm

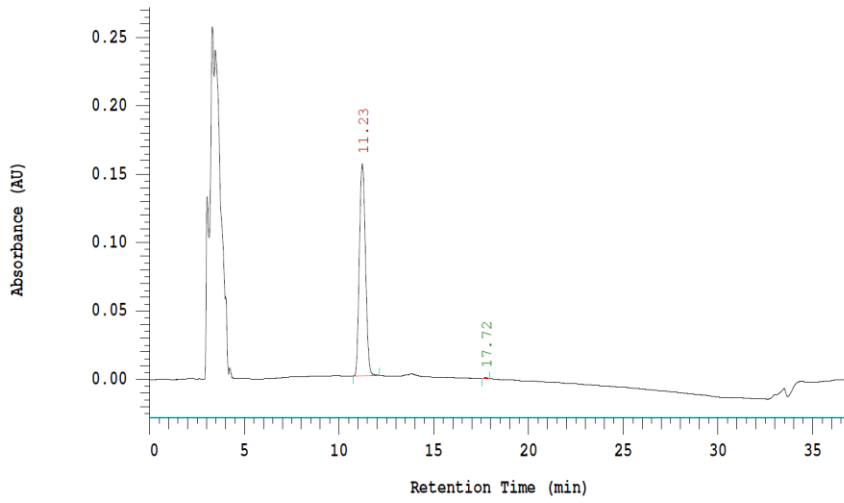

Processing Method: Purity\_37min  
Column Type: Column  
Method Description:

Method Developer: Bob

Peak Quantitation: AREA  
Calculation Method: AREA%

| No. | RT    | Area    | Height | Conc 1  |
|-----|-------|---------|--------|---------|
| 1   | 11.23 | 1710714 | 77480  | 99.745  |
| 2   | 17.72 | 4377    | 428    | 0.255   |
|     |       | 1715091 | 77908  | 100.000 |

Peak rejection level: 0



Sample Name: 06BP-030-184-50  
Injection from this vial: 1 of 1  
Sample Description:

Vial Number: 124  
Volume: 20.0 ul

Chrom Type: Fixed WL Chromatogram, 254 nm

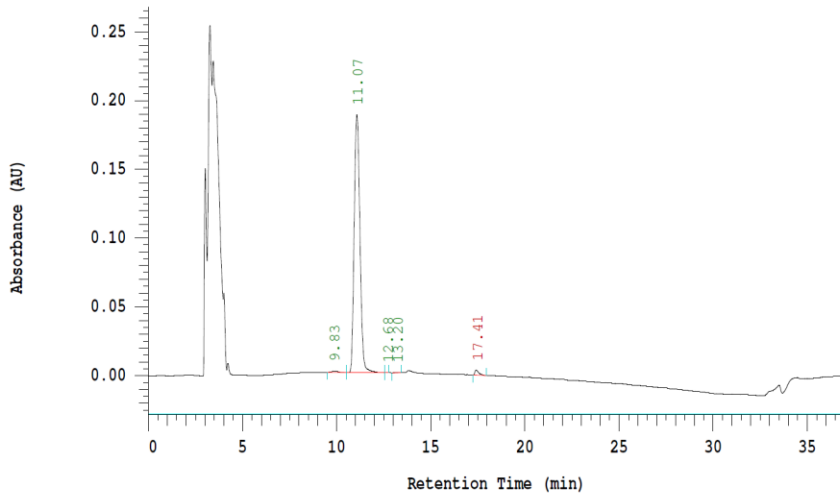

Processing Method: Purity\_37min  
Column Type: Column  
Method Description: Method Developer: Bob

Peak Quantitation: AREA  
Calculation Method: AREA%

| No. | RT    | Area    | Height | Conc 1  |
|-----|-------|---------|--------|---------|
| 1   | 9.83  | 11809   | 546    | 0.587   |
| 2   | 11.07 | 1971673 | 93614  | 97.981  |
| 3   | 12.68 | 634     | 106    | 0.032   |
| 4   | 13.20 | 2412    | 164    | 0.120   |
| 5   | 17.41 | 25770   | 1845   | 1.281   |
|     |       | 2012298 | 96275  | 100.000 |

Peak rejection level: 0



Sample Name: 07BP-114-075-50  
 Injection from this vial: 1 of 1  
 Sample Description:

Vial Number: 30  
 Volume: 20.0 ul

Chrom Type: Fixed WL Chromatogram, 254 nm

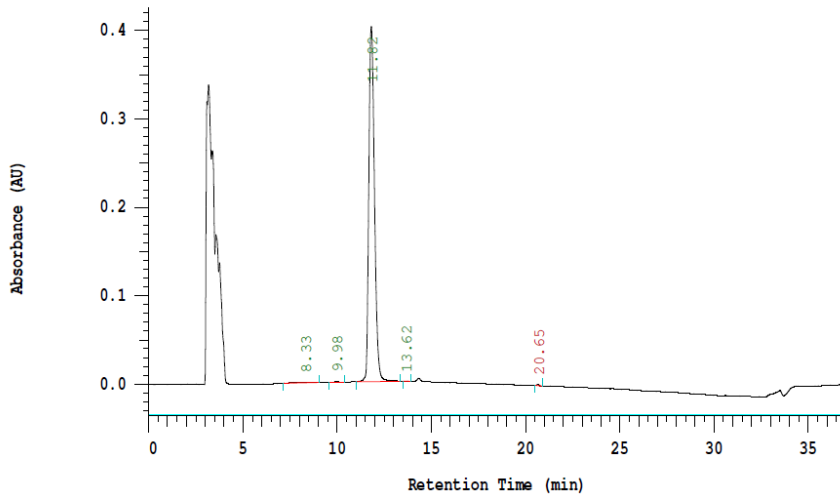

Processing Method: Purity\_37min  
 Column Type: Column  
 Method Description: Method Developer: Bob

Peak Quantitation: AREA  
 Calculation Method: AREA%

| No. | RT    | Area    | Height | Conc 1  |
|-----|-------|---------|--------|---------|
| 1   | 8.33  | 22832   | 315    | 0.548   |
| 2   | 9.98  | 3663    | 233    | 0.088   |
| 3   | 11.82 | 4128163 | 200684 | 99.163  |
| 4   | 13.62 | 1867    | 135    | 0.045   |
| 5   | 20.65 | 6479    | 794    | 0.156   |
|     |       | 4163004 | 202161 | 100.000 |

Peak rejection level: 0

Figure S20. NMR and HPLC spectra of compound 18.

(*S*)-(4-chloro-3,5-difluorophenyl)(3-((4-(4-ethylpiperazin-1-yl)-6-((5-methyl-1H-pyrazol-3-yl)amino)pyrimidin-2-yl)amino)pyrrolidin-1-yl)methanone (18)

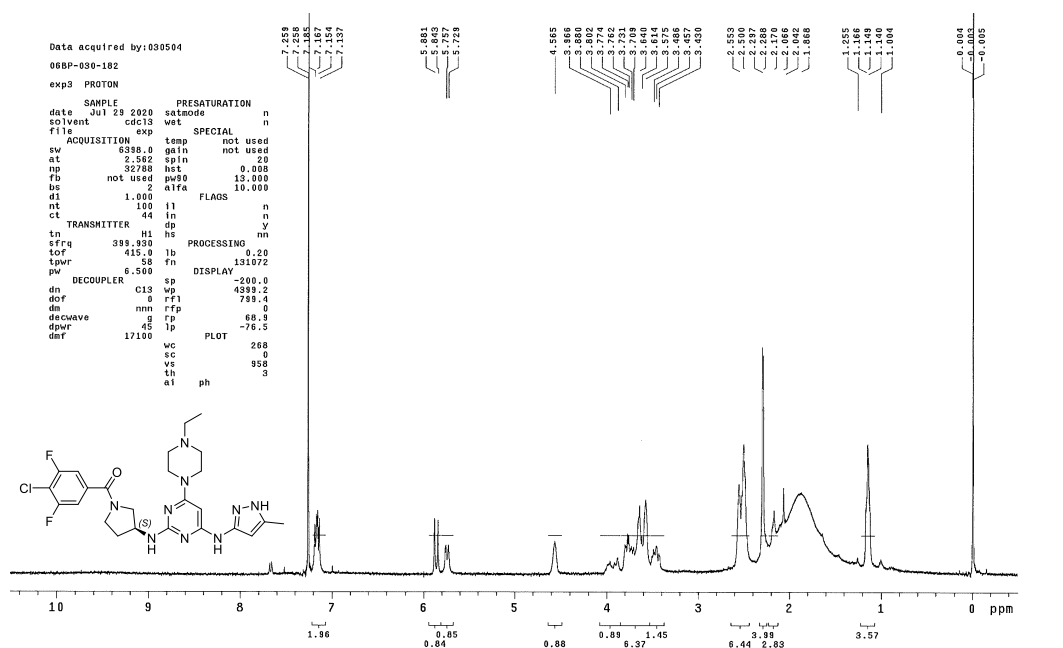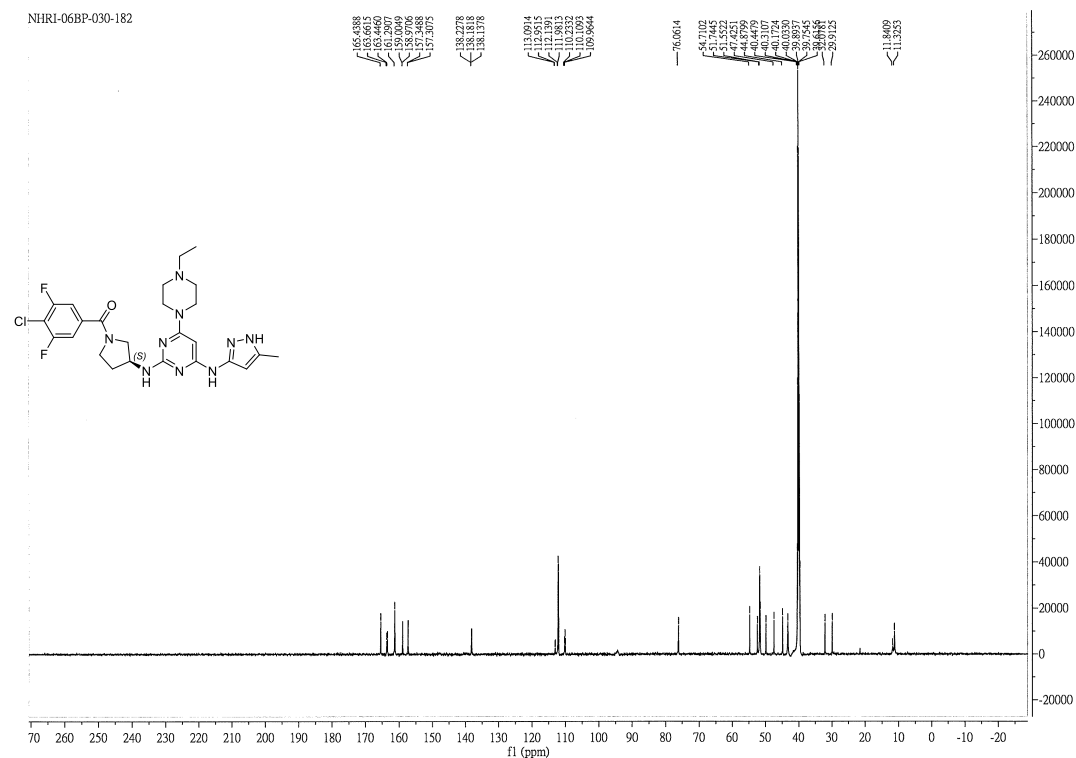

Sample Name: 06BP-030-182-50  
Injection from this vial: 1 of 1  
Sample Description:

Vial Number: 152  
Volume: 20.0 ul

Chrom Type: Fixed WL Chromatogram, 254 nm

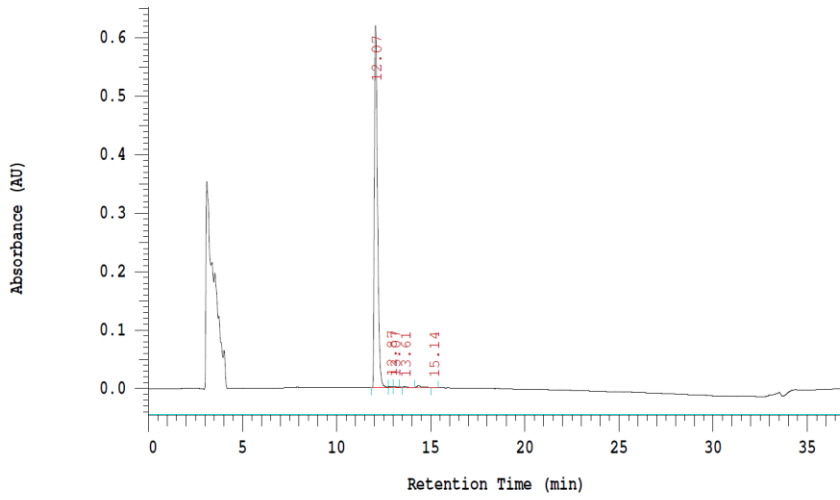

Processing Method: Purity\_37min  
Column Type: Column  
Method Description:

Method Developer: Bob

Peak Quantitation: AREA  
Calculation Method: AREA%

| No. | RT    | Area    | Height | Conc 1  |
|-----|-------|---------|--------|---------|
| 1   | 12.07 | 3542144 | 309584 | 98.778  |
| 2   | 12.87 | 13516   | 1111   | 0.377   |
| 3   | 13.07 | 12178   | 957    | 0.340   |
| 4   | 13.61 | 14727   | 929    | 0.411   |
| 5   | 15.14 | 3384    | 285    | 0.094   |
|     |       | 3585949 | 312866 | 100.000 |

Peak rejection level: 0



**Figure S21. NMR and HPLC spectra of compound 19.**  
**(S)-3-((4-(4-ethylpiperazin-1-yl)-6-((5-methyl-1H-pyrazol-3-yl)amino)pyrimidin-2-yl)amino)pyrrolidin-1-yl)(2,4,5-trifluorophenyl)methanone (19)**

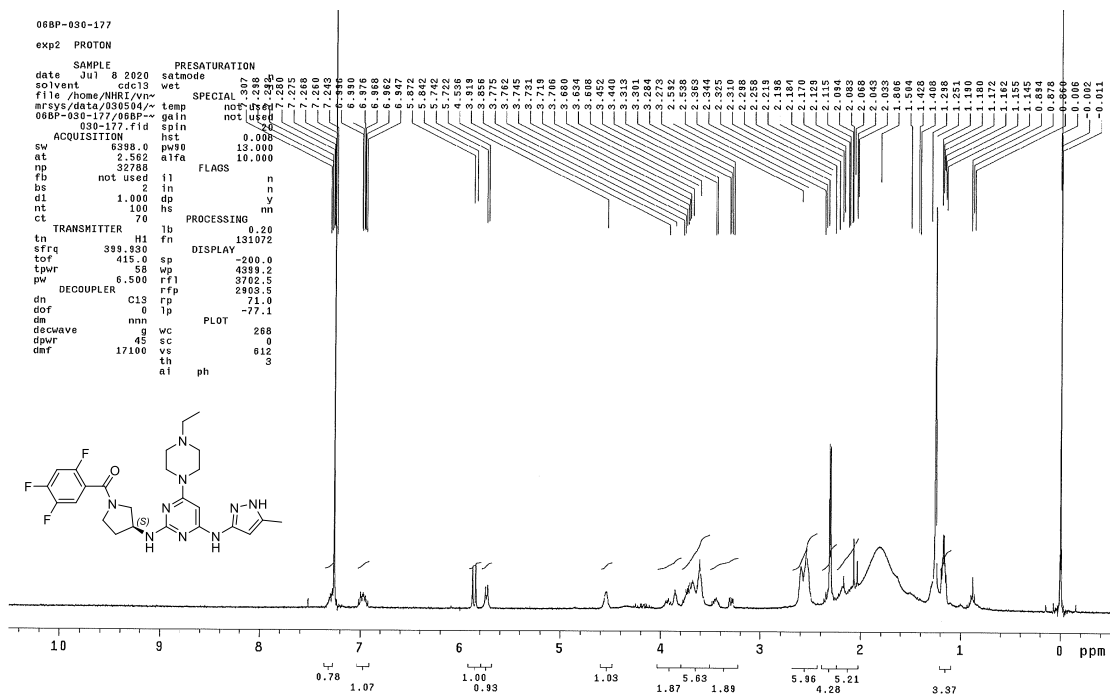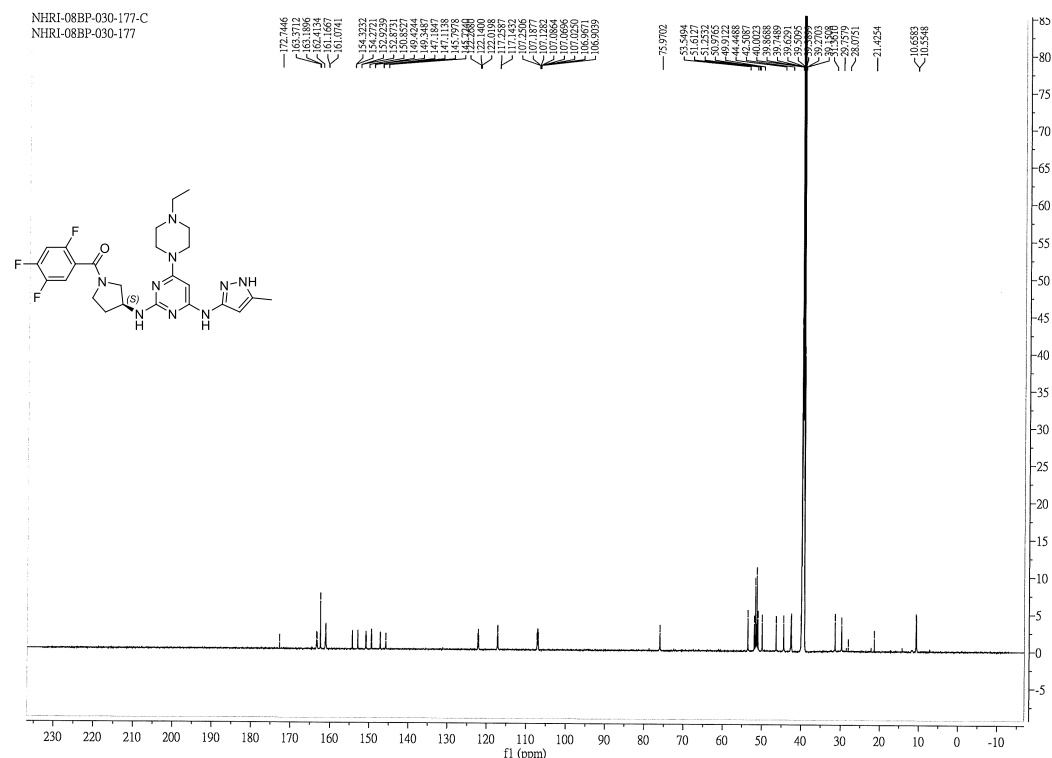

Sample Name: 06BP-030-177-50  
Injection from this vial: 1 of 1  
Sample Description:

Vial Number: 118  
Volume: 20.0 ul

Chrom Type: Fixed WL Chromatogram, 254 nm

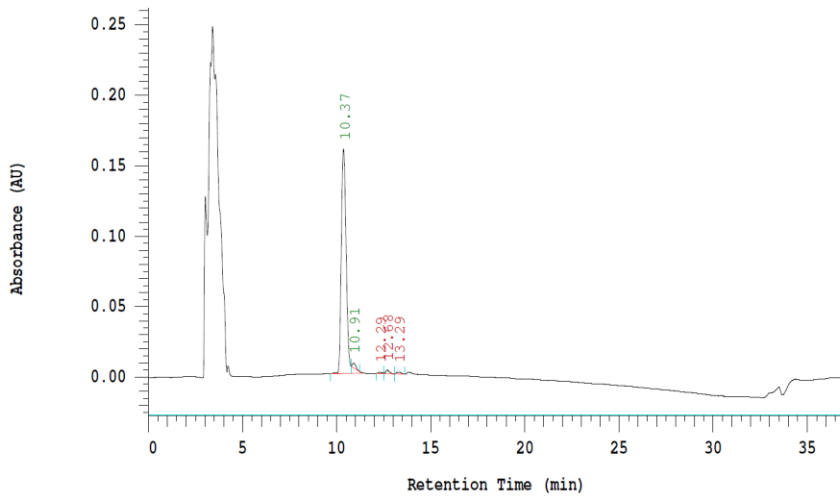

Processing Method: Purity\_37min  
Column Type: Column  
Method Description:

Method Developer: Bob

Peak Quantitation: AREA  
Calculation Method: AREA%

| No. | RT    | Area    | Height | Conc 1  |
|-----|-------|---------|--------|---------|
| 1   | 10.37 | 1438636 | 79559  | 96.235  |
| 2   | 10.91 | 22159   | 1636   | 1.482   |
| 3   | 12.29 | 6921    | 441    | 0.463   |
| 4   | 12.68 | 16414   | 1251   | 1.098   |
| 5   | 13.29 | 10781   | 691    | 0.721   |
|     |       | 1494911 | 83578  | 100.000 |

Peak rejection level: 0

**Figure S22. NMR and HPLC spectra of compound 20.**  
**(S)-(6-chloro-2-fluoropyridin-3-yl)(3-((4-(4-ethylpiperazin-1-yl)-6-((5-methyl-1H-pyrazol-3-yl)amino)pyrimidin-2-yl)amino)pyrrolidin-1-yl)methanone (20)**

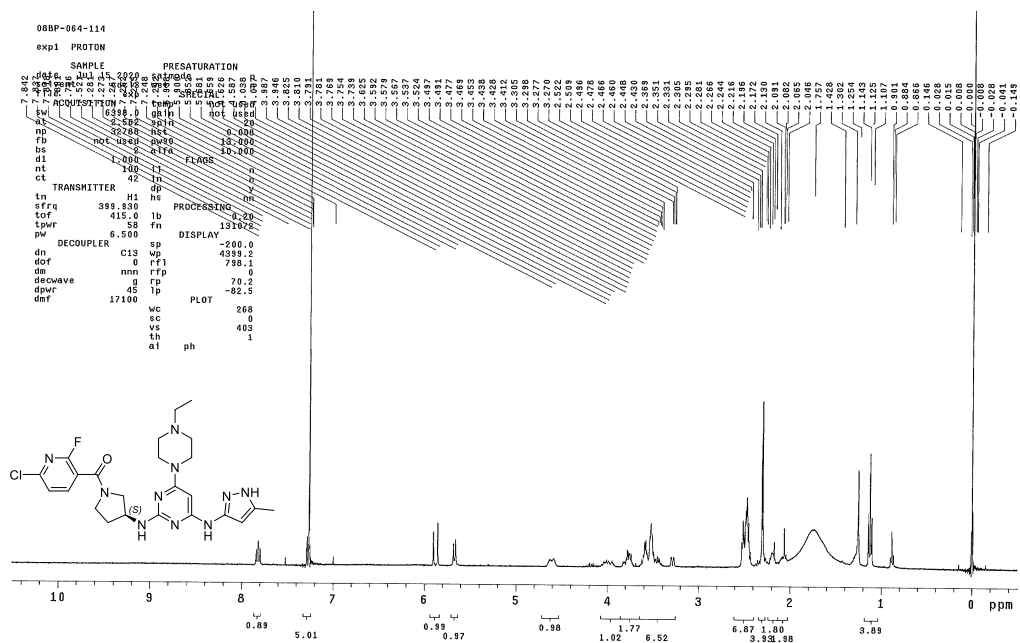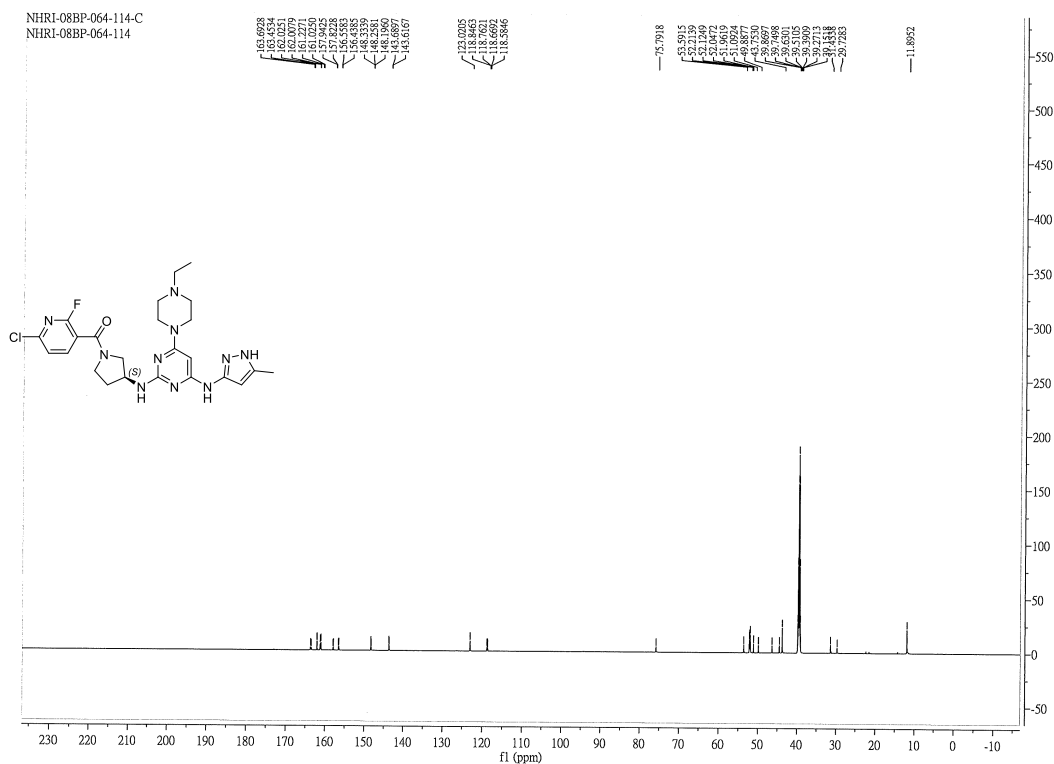

Sample Name: 08BP-064-114-50  
Injection from this vial: 1 of 1  
Sample Description:

Vial Number: 114  
Volume: 20.0 ul

Chrom Type: Fixed WL Chromatogram, 254 nm

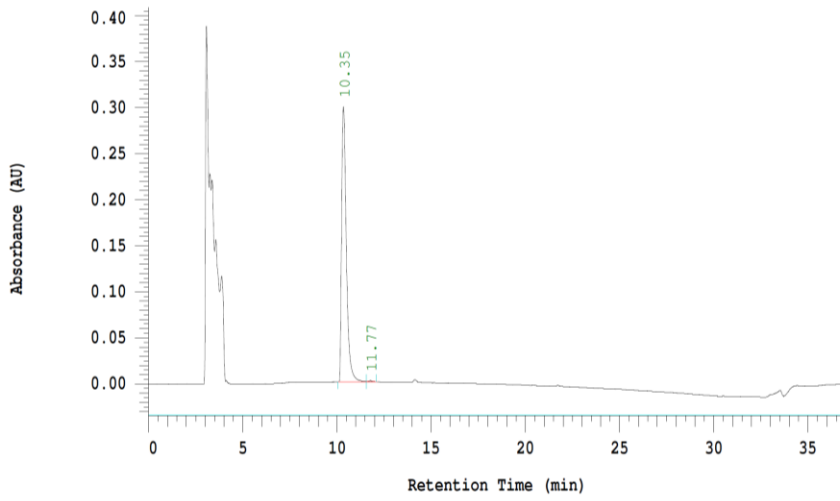

Processing Method: Purity\_37min  
Column Type: Column  
Method Description: Method Developer: Bob

Peak Quantitation: AREA  
Calculation Method: AREA%

| No. | RT    | Area    | Height | Conc 1  |
|-----|-------|---------|--------|---------|
| 1   | 10.35 | 2563056 | 149367 | 99.709  |
| 2   | 11.77 | 7488    | 450    | 0.291   |
|     |       | 2570544 | 149817 | 100.000 |

Peak rejection level: 0



Sample Name: 07BP-007-131-50  
Injection from this vial: 1 of 1  
Sample Description:

Vial Number: 106  
Volume: 20.0 ul

Chrom Type: Fixed WL Chromatogram, 254 nm

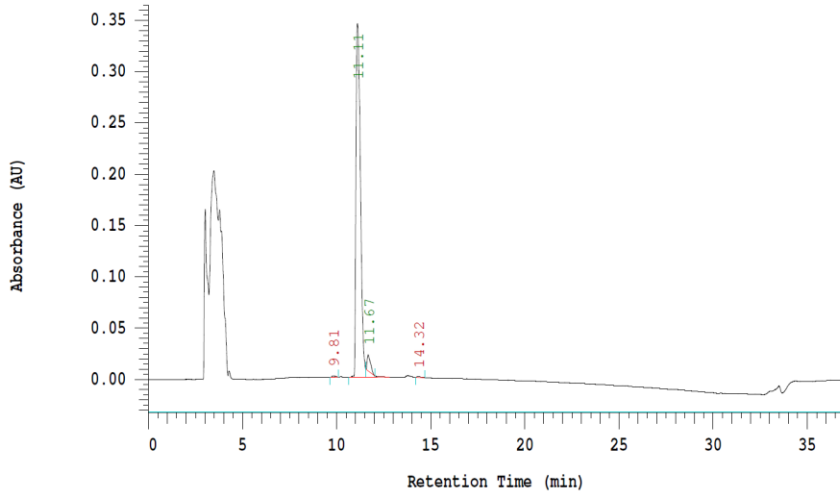

Processing Method: Purity\_37min  
Column Type: Column  
Method Description:

Method Developer: Bob

Peak Quantitation: AREA  
Calculation Method: AREA%

| No. | RT    | Area    | Height | Conc 1  |
|-----|-------|---------|--------|---------|
| 1   | 9.81  | 8130    | 651    | 0.272   |
| 2   | 11.11 | 2878906 | 172210 | 96.337  |
| 3   | 11.67 | 95794   | 7855   | 3.206   |
| 4   | 14.32 | 5532    | 334    | 0.185   |
|     |       | 2988362 | 181050 | 100.000 |

Peak rejection level: 0



Sample Name: 08BP-064-110A-50  
Injection from this vial: 1 of 1  
Sample Description:

Vial Number: 164  
Volume: 20.0 ul

Chrom Type: Fixed WL Chromatogram, 254 nm

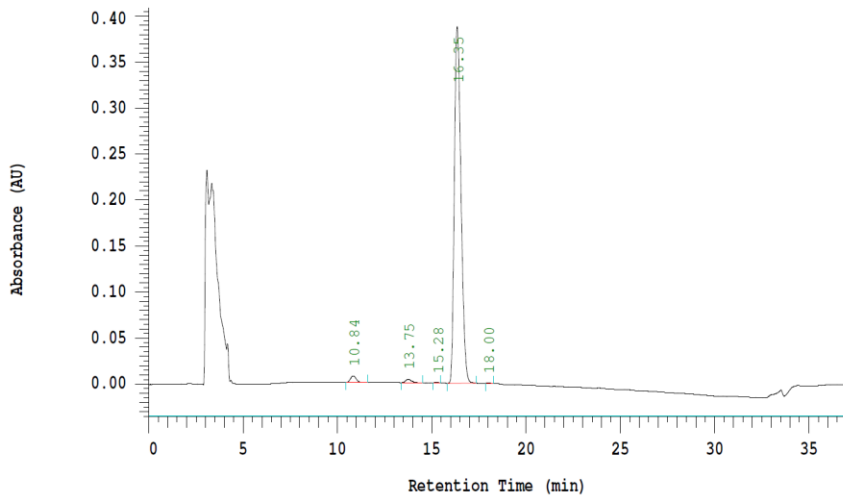

Processing Method: Purity\_37min  
Column Type: Column  
Method Description:

Method Developer: Bob

Peak Quantitation: AREA  
Calculation Method: AREA%

| No. | RT    | Area    | Height | Conc 1  |
|-----|-------|---------|--------|---------|
| 1   | 10.84 | 71168   | 3494   | 1.485   |
| 2   | 13.75 | 42392   | 1954   | 0.884   |
| 3   | 15.28 | 1760    | 140    | 0.037   |
| 4   | 16.35 | 4675766 | 193693 | 97.548  |
| 5   | 18.00 | 2210    | 184    | 0.046   |
|     |       | 4793296 | 199465 | 100.000 |

Peak rejection level: 0



**Figure S25. NMR and HPLC spectra of compound 23.**  
**Ethyl (S)-3-((2-((1-(4-chloro-2-fluorobenzoyl)pyrrolidin-3-yl)amino)-6-(4-ethylpiperazin-1-yl)pyrimidin-4-yl)amino)-5-methyl-1H-pyrazole-1-carboxylate (23)**

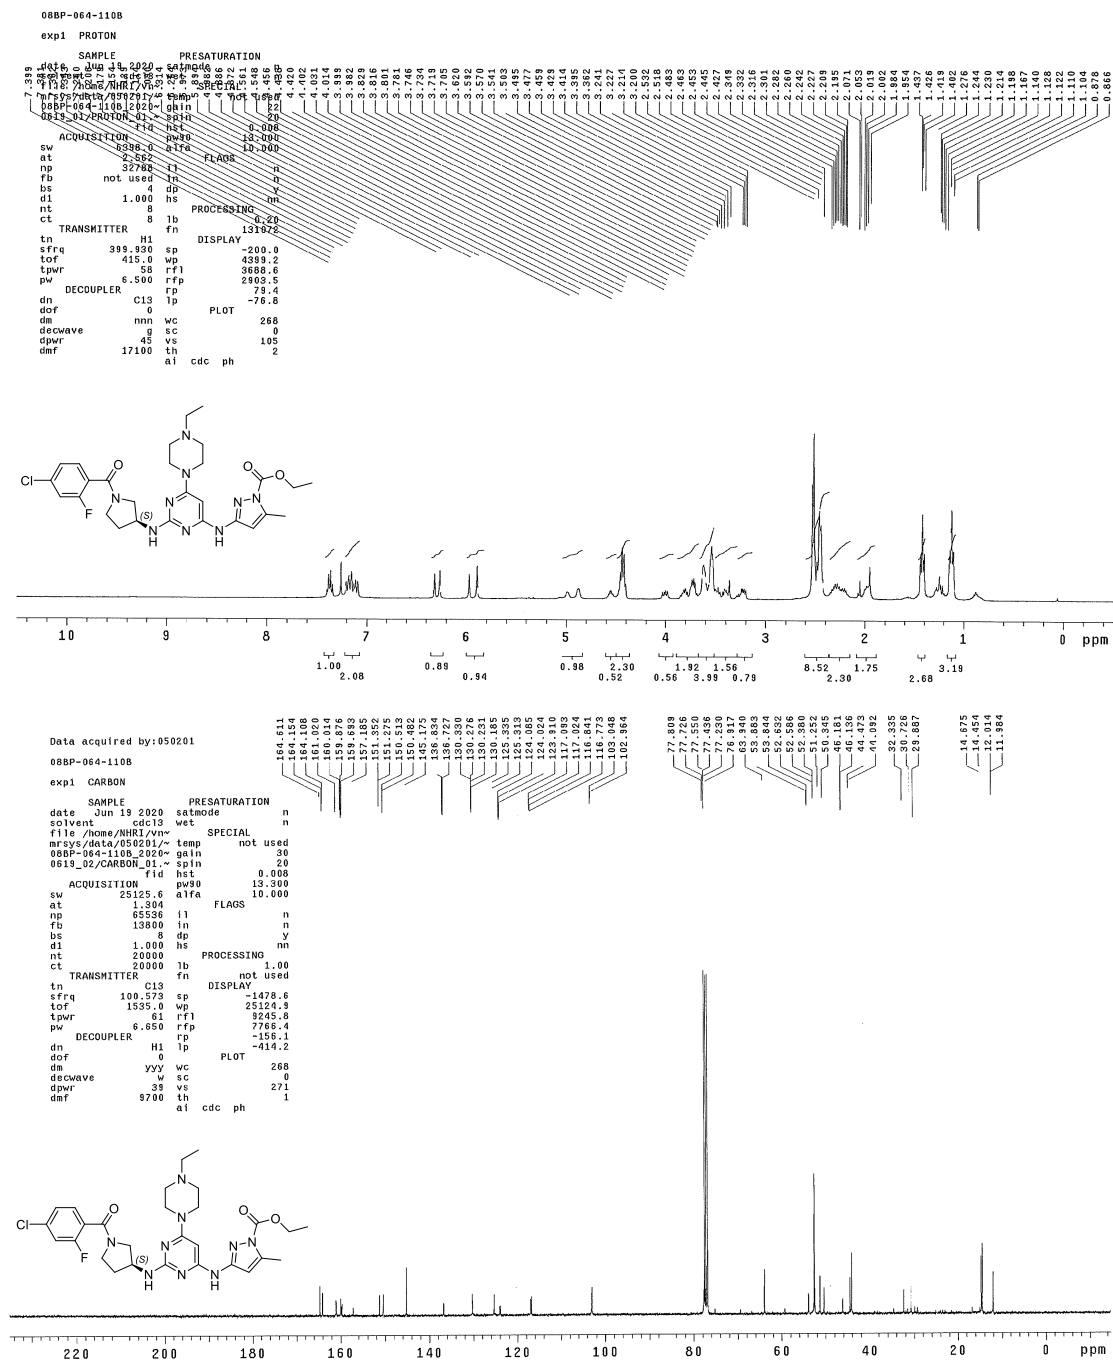

Sample Name: 08BP-064-110B-50  
Injection from this vial: 1 of 1  
Sample Description:

Vial Number: 76  
Volume: 20.0 ul

Chrom Type: Fixed WL Chromatogram, 254 nm

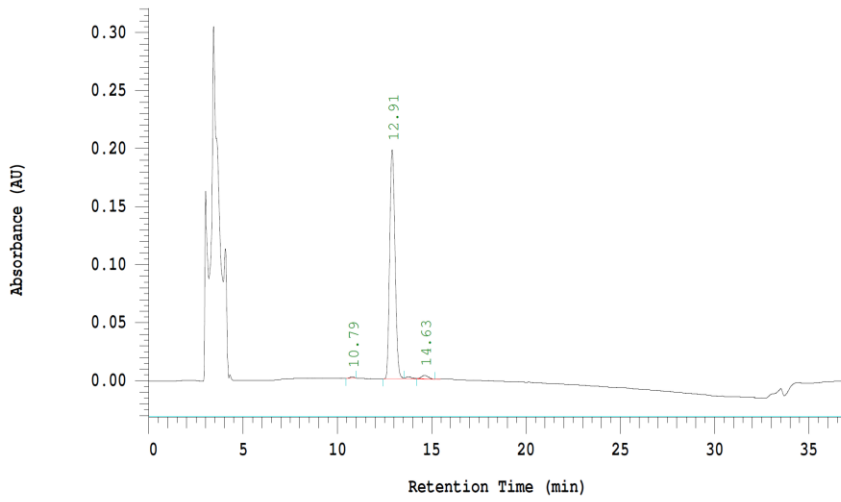

Processing Method: Purity\_37min  
Column Type: Column  
Method Description:

Method Developer: Bob

Peak Quantitation: AREA  
Calculation Method: AREA%

| No. | RT    | Area    | Height | Conc 1  |
|-----|-------|---------|--------|---------|
| 1   | 10.79 | 7474    | 435    | 0.380   |
| 2   | 12.91 | 1920236 | 98637  | 97.667  |
| 3   | 14.63 | 38385   | 1542   | 1.952   |
|     |       | 1966095 | 100614 | 100.000 |

Peak rejection level: 0

**Figure S26. NMR and HPLC spectra of compound 24.**  
*tert*-butyl (*S*)-5-((2-((1-(4-chloro-2-fluorobenzoyl)pyrrolidin-3-yl)amino)-6-(4-ethylpiperazin-1-yl)pyrimidin-4-yl)amino)-3-methyl-1H-pyrazole-1-carboxylate (24)

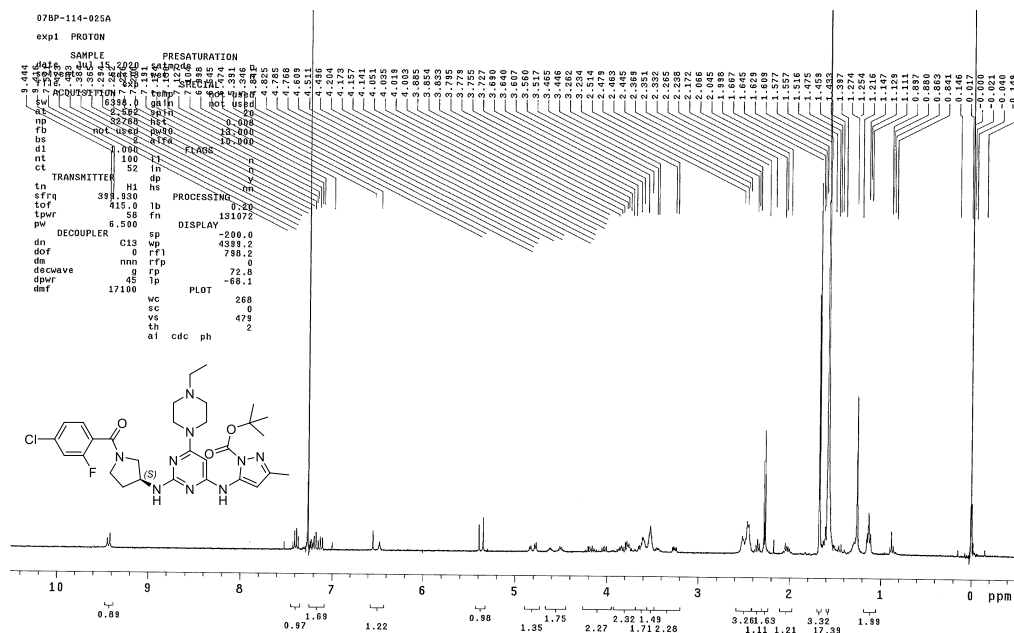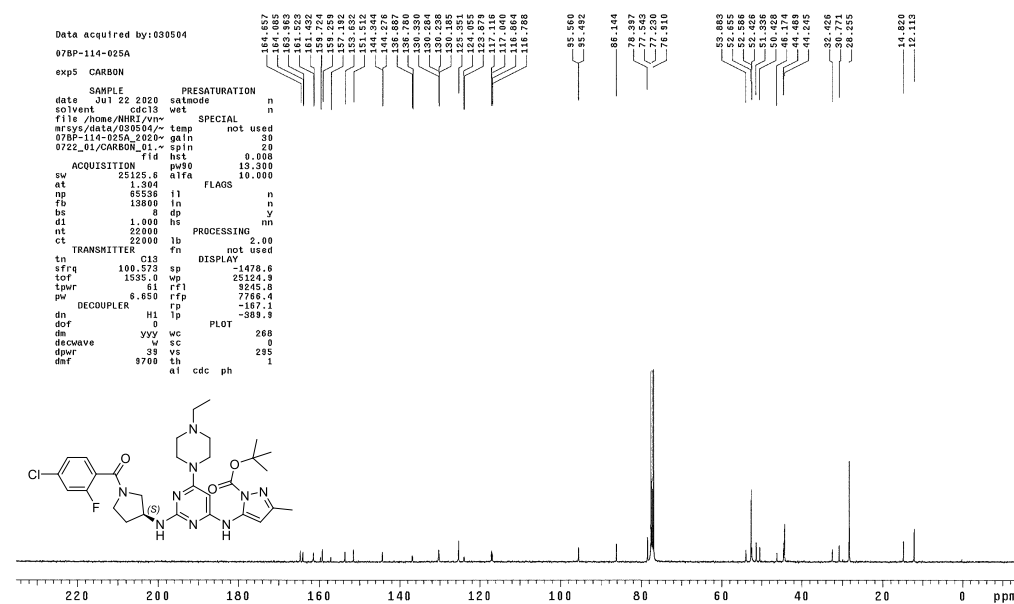

Sample Name: 07BP-114-025A-1-50  
Injection from this vial: 1 of 1  
Sample Description:

Vial Number: 56  
Volume: 20.0 ul

Chrom Type: Fixed WL Chromatogram, 254 nm

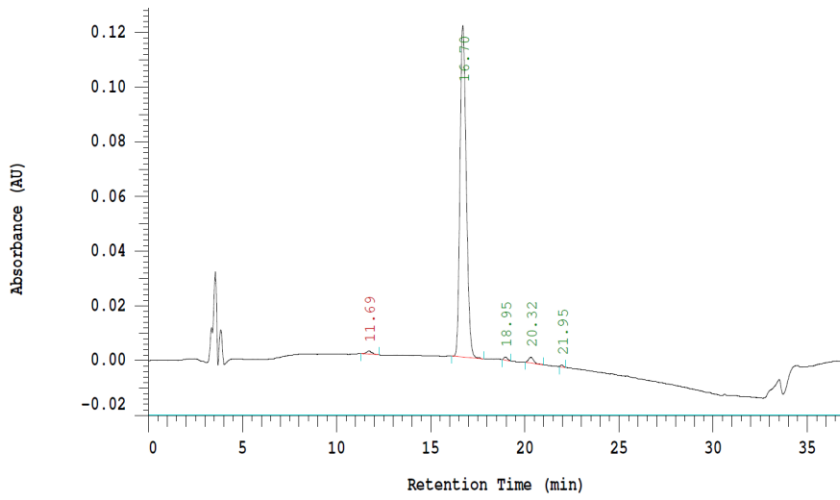

Processing Method: Purity\_37min  
Column Type: Column  
Method Description:

Method Developer: Bob

Peak Quantitation: AREA  
Calculation Method: AREA%

| No. | RT    | Area    | Height | Conc 1  |
|-----|-------|---------|--------|---------|
| 1   | 11.69 | 10749   | 505    | 0.754   |
| 2   | 16.70 | 1384707 | 60567  | 97.101  |
| 3   | 18.95 | 7700    | 598    | 0.540   |
| 4   | 20.32 | 19485   | 1043   | 1.366   |
| 5   | 21.95 | 3406    | 397    | 0.239   |
|     |       | 1426047 | 63110  | 100.000 |

Peak rejection level: 0

Figure S27. NMR and HPLC spectra of compound 25.

(S)-1-(5-((2-((1-(4-chloro-2-fluorobenzoyl)pyrrolidin-3-yl)amino)-6-(4-ethylpiperazin-1-yl)pyrimidin-4-yl)amino)-3-methyl-1H-pyrazol-1-yl)propan-1-one (25)

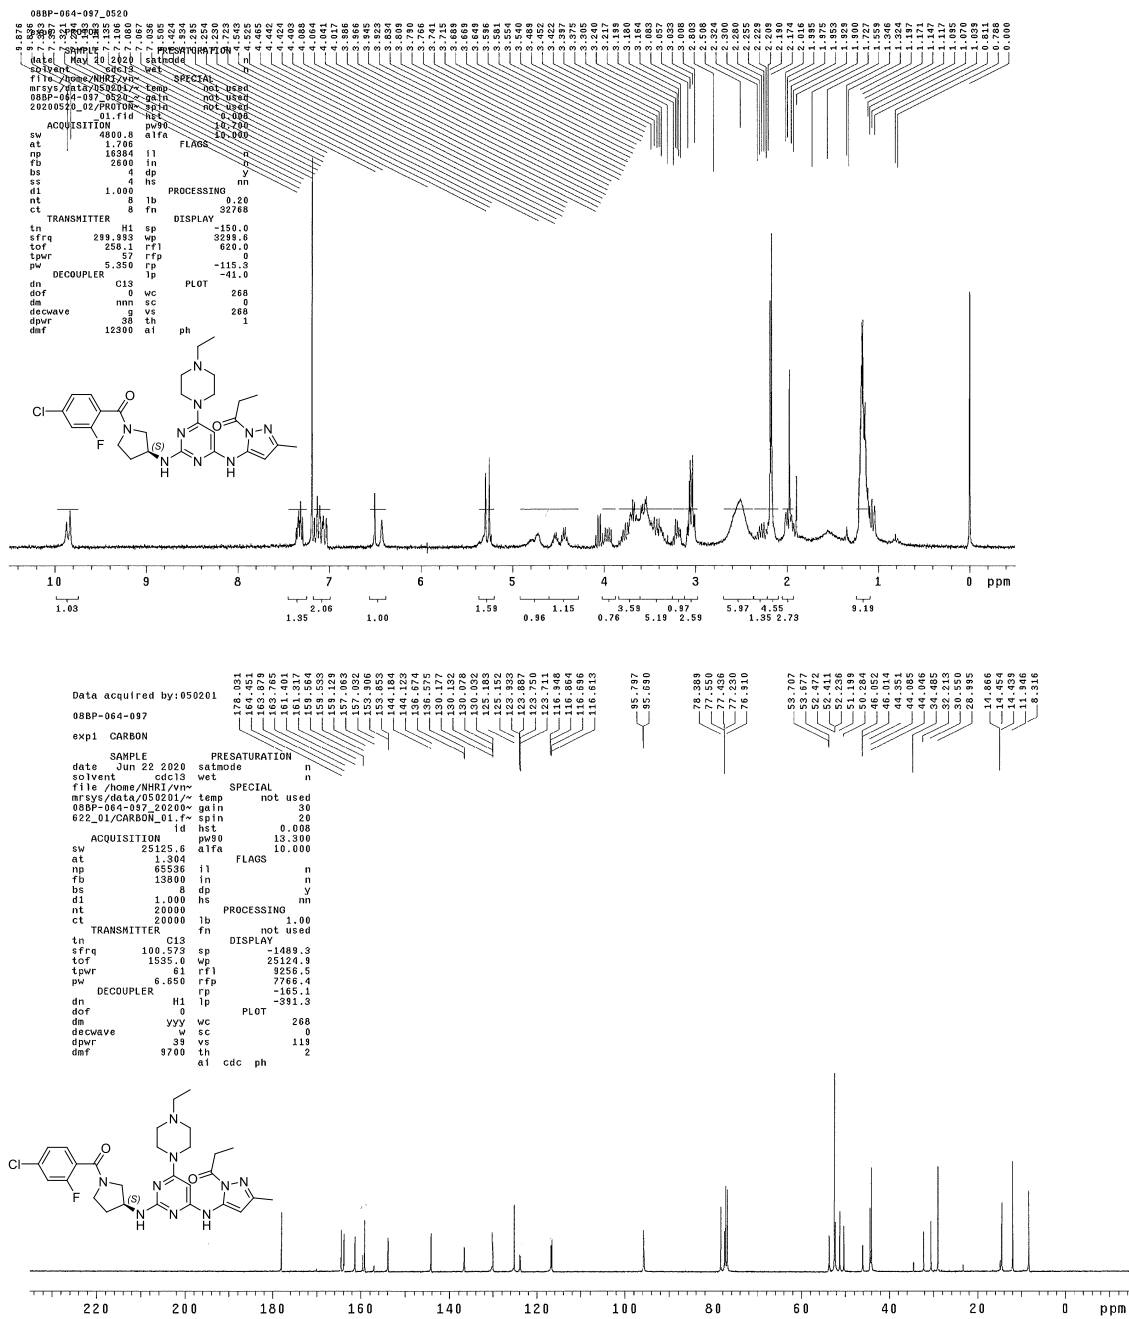

Sample Name: 08BP-064-097A\_0630-50 Vial Number: 84  
 Injection from this vial: 1 of 1 Volume: 20.0 ul  
 Sample Description:

Chrom Type: Fixed WL Chromatogram, 254 nm

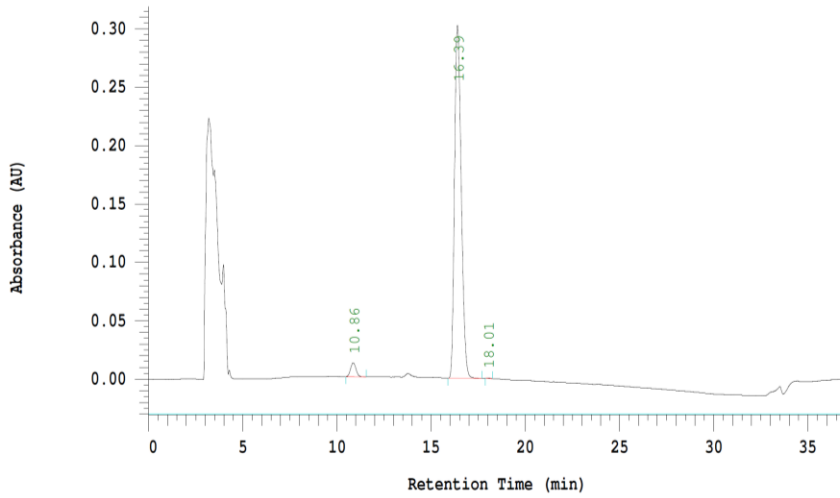

Processing Method: Purity\_37min  
 Column Type: Column Method Developer: Bob  
 Method Description:

Peak Quantitation: AREA  
 Calculation Method: AREA%

| No. | RT    | Area    | Height | Conc 1  |
|-----|-------|---------|--------|---------|
| 1   | 10.86 | 118935  | 5933   | 3.122   |
| 2   | 16.39 | 3688002 | 150897 | 96.812  |
| 3   | 18.01 | 2522    | 200    | 0.066   |
|     |       | 3809459 | 157030 | 100.000 |

Peak rejection level: 0

Figure S28. NMR and HPLC spectra of compound 26.

(*S*)-1-(3-((2-((1-(4-chloro-2-fluorobenzoyl)pyrrolidin-3-yl)amino)-6-(4-ethylpiperazin-1-yl)pyrimidin-4-yl)amino)-5-methyl-1H-pyrazol-1-yl)propan-1-one (26)

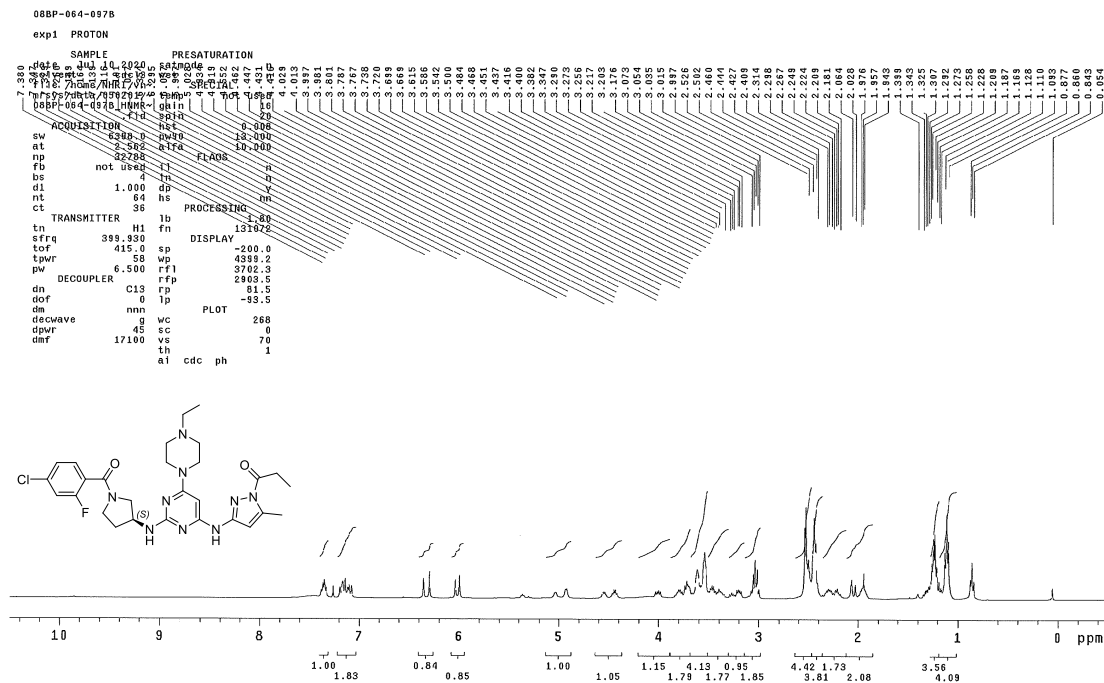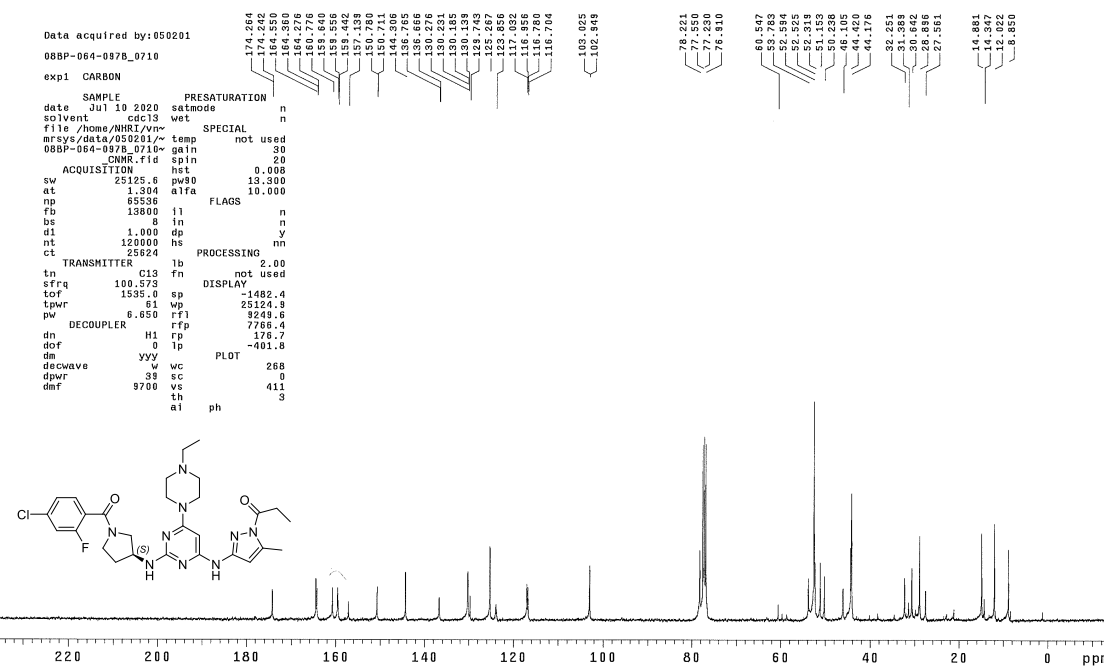

Sample Name: 08BP-064-097B-50  
Injection from this vial: 1 of 1  
Sample Description:

Vial Number: 82  
Volume: 20.0 ul

Chrom Type: Fixed WL Chromatogram, 254 nm

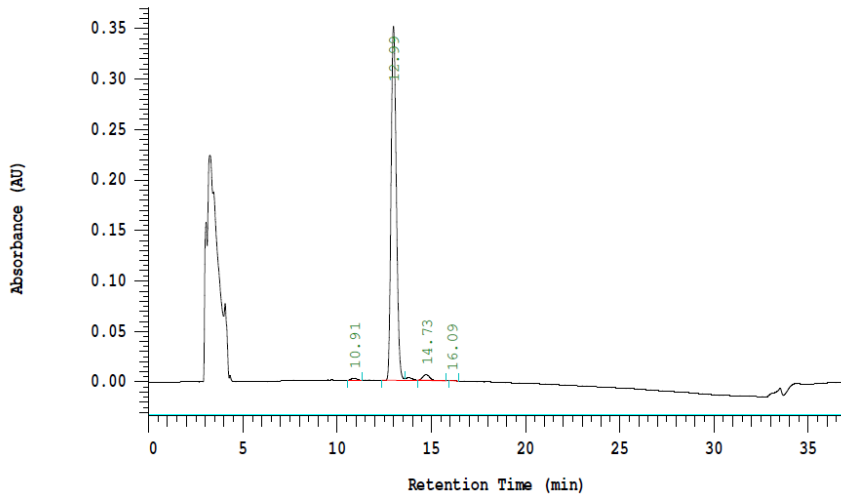

Processing Method: Purity\_37min  
Column Type: Column  
Method Description:

Method Developer: Bob

Peak Quantitation: AREA  
Calculation Method: AREA%

| No. | RT    | Area    | Height | Conc 1  |
|-----|-------|---------|--------|---------|
| 1   | 10.91 | 18112   | 916    | 0.527   |
| 2   | 12.99 | 3342574 | 175226 | 97.322  |
| 3   | 14.73 | 70140   | 2817   | 2.042   |
| 4   | 16.09 | 3723    | 215    | 0.108   |
|     |       | 3434549 | 179174 | 100.000 |

Peak rejection level: 0



Figure S29. NMR and HPLC spectra of compound 27.

(S)-1-(5-((2-((1-(4-chloro-2-fluorobenzoyl)pyrrolidin-3-yl)amino)-6-(4-ethylpiperazin-1-yl)pyrimidin-4-yl)amino)-3-methyl-1H-pyrazol-1-yl)-2,2-dimethylpropan-1-one (27)

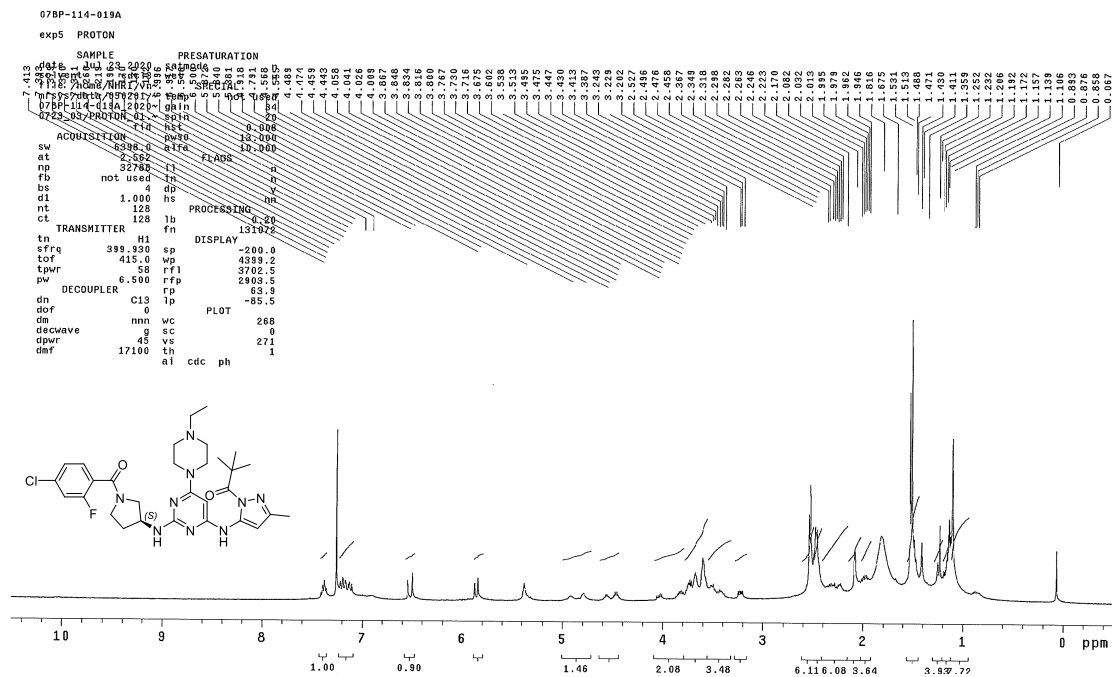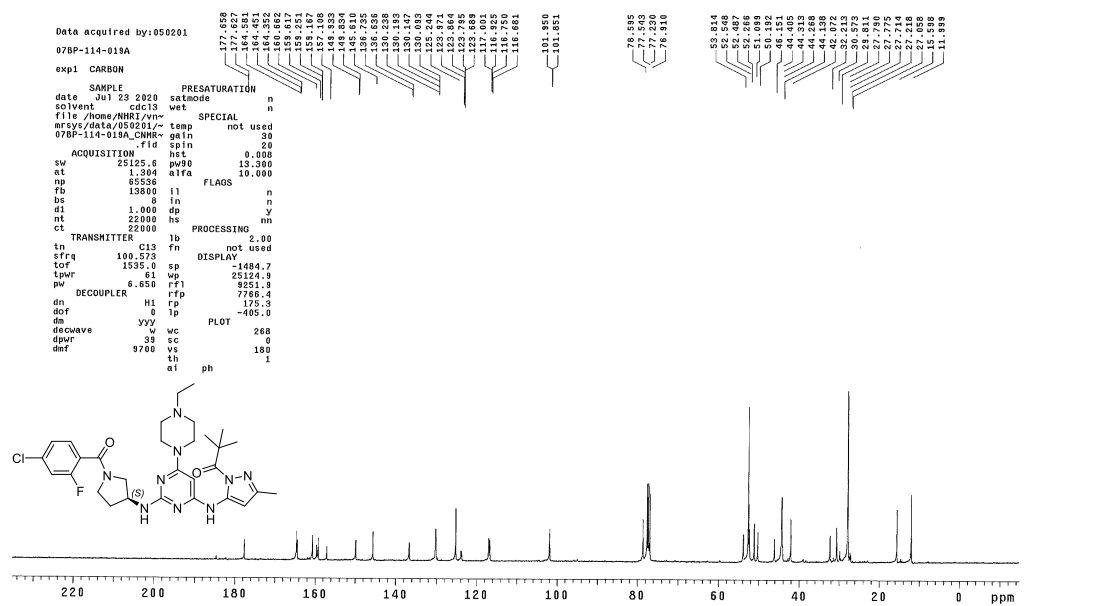

Sample Name: 07BP-114-019A-50 Vial Number: 52  
 Injection from this vial: 1 of 1 Volume: 20.0 ul  
 Sample Description:

Chrom Type: Fixed WL Chromatogram, 254 nm

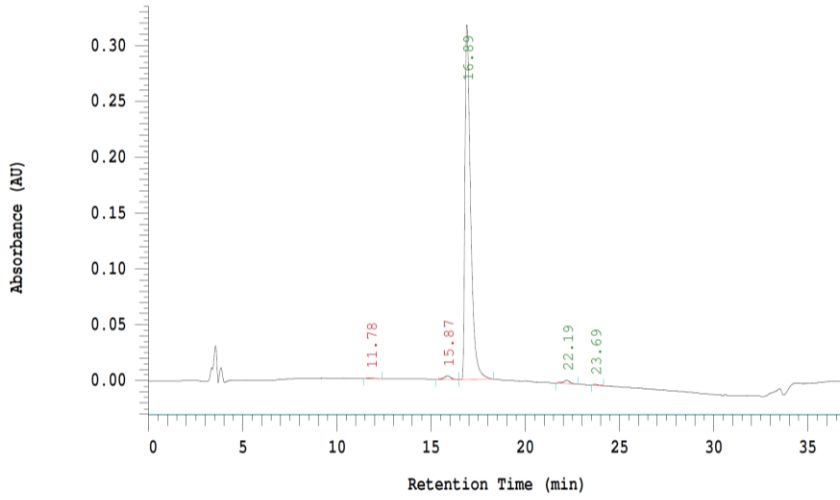

Processing Method: Purity\_37min  
 Column Type: Column Method Developer: Bob  
 Method Description:

Peak Quantitation: AREA  
 Calculation Method: AREA%

| No. | RT    | Area    | Height | Conc 1  |
|-----|-------|---------|--------|---------|
| 1   | 11.78 | 5807    | 275    | 0.173   |
| 2   | 15.87 | 37714   | 1492   | 1.123   |
| 3   | 16.89 | 3273011 | 158605 | 97.451  |
| 4   | 22.19 | 35921   | 1444   | 1.070   |
| 5   | 23.69 | 6180    | 353    | 0.184   |
|     |       | 3358633 | 162169 | 100.000 |

Peak rejection level: 0

Figure S30. <sup>1</sup>H NMR spectrum of compound 29.

2,6-dichloro-N-(5-methyl-1H-pyrazol-3-yl)pyrimidin-4-amine (29)

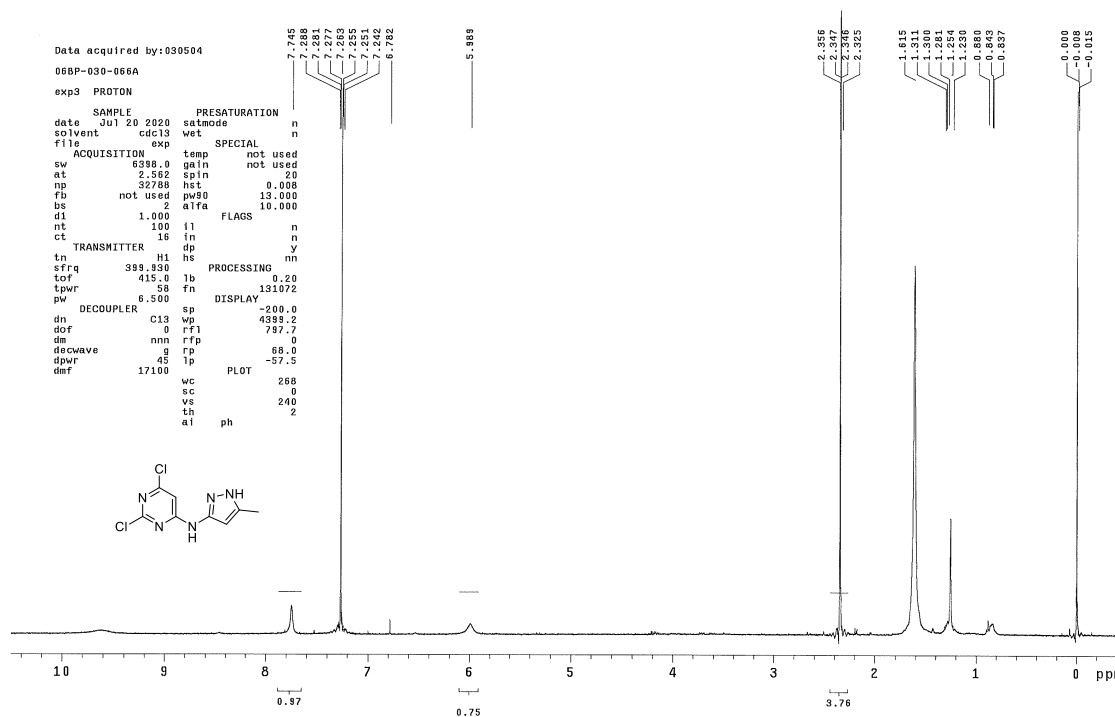

**Figure S31. <sup>1</sup>H NMR spectrum of compound 30.**  
**(S)-(3-chloro-2-fluorophenyl)(3-((4-chloro-6-((5-methyl-1H-pyrazol-3-yl)amino)pyrimidin-2-yl)amino)pyrrolidin-1-yl)methanone (30)**

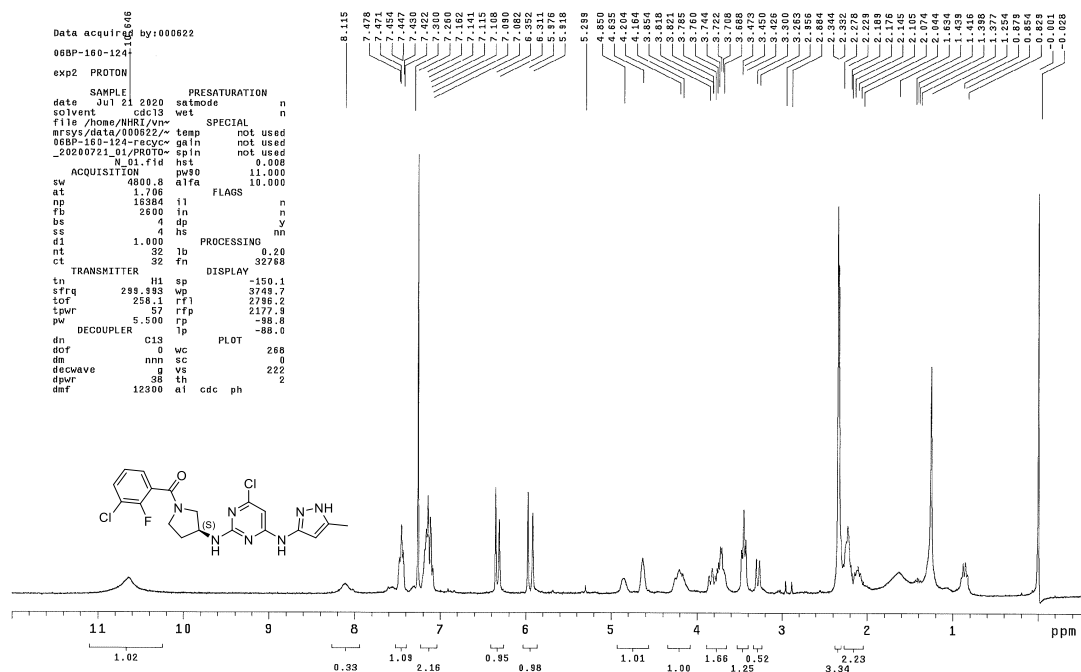

**Figure S32. <sup>1</sup>H NMR spectrum of compound 32.**  
***tert*-butyl (*S*)-3-((4,6-dichloropyrimidin-2-yl)amino)pyrrolidine-1-carboxylate**  
**(32)**

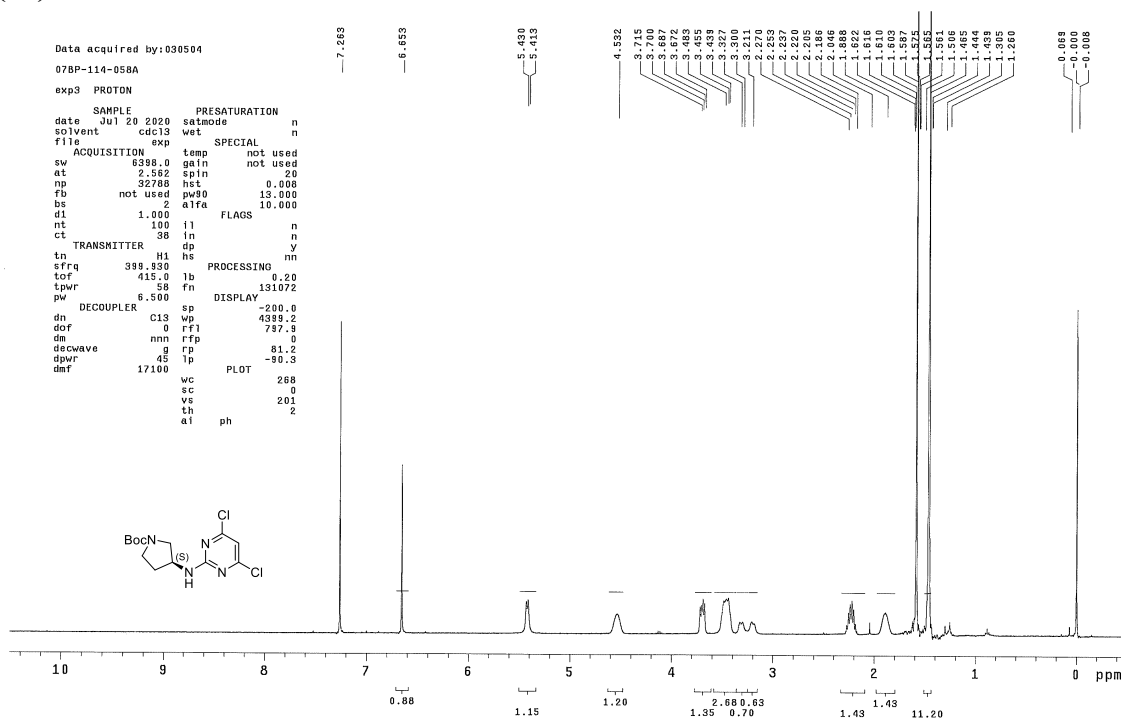

**Figure S33. <sup>1</sup>H NMR spectrum of compound 33.**  
***tert*-butyl (*S*)-3-((4-chloro-6-((5-methyl-1H-pyrazol-3-yl)amino)pyrimidin-2-yl)amino)pyrrolidine-1-carboxylate (33)**

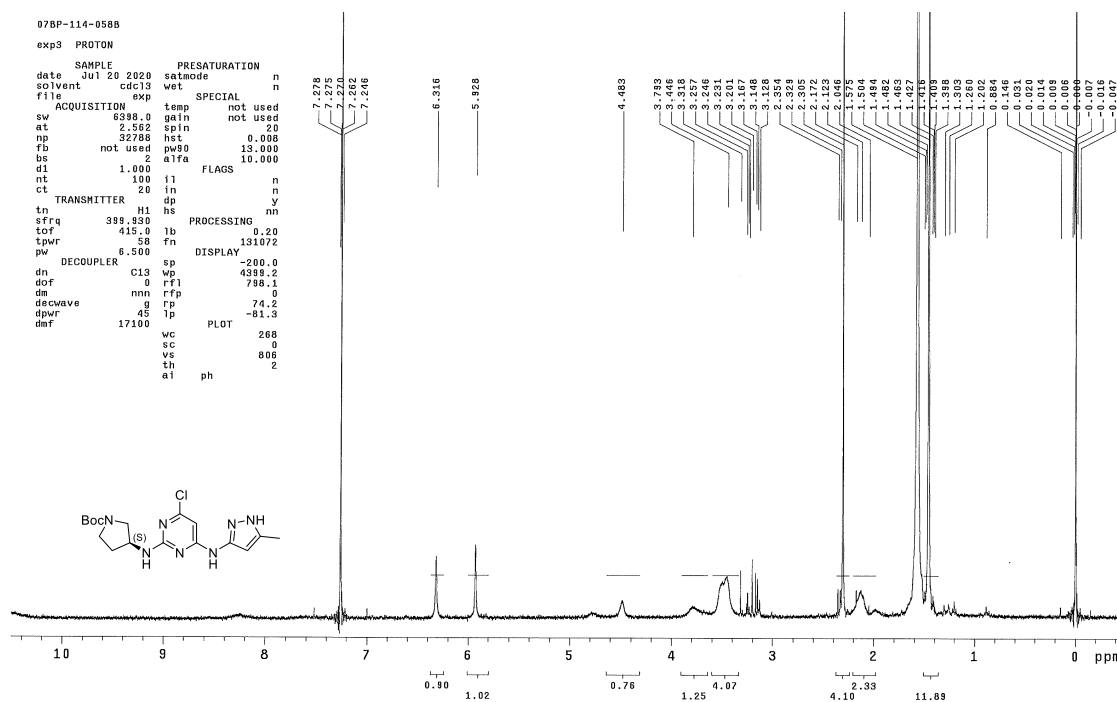

Supplement: jm0c01806_si_002.pdf [file jm0c01806_si_002.pdf]
